# Supplementary material for: Insights into the mechanism and regioselectivity in Ni-catalysed redox-relay migratory hydroarylation of alkenes with arylborons
Source: Royal Society of Chemistry journal article supplement (doi:10.1039/d1cc05125c), 2021-01-01
Supplement: d1cc05125c1.pdf [file d1cc05125c1.pdf]

## Supporting Information

### Insights into the mechanism and regioselectivity in Ni-catalysed redox-relay migratory hydroarylation of alkenes with arylborons

Qi Cheng,<sup>a</sup> Wenjing Liu<sup>\*b</sup> and Yanfeng Dang<sup>\*a</sup>

<sup>a</sup> Tianjin Key Laboratory of Molecular Optoelectronic Sciences, Department of Chemistry, School of Science, Tianjin University, Tianjin 300072, China.

E-mail: yanfeng.dang@tju.edu.cn

<sup>b</sup> Key Laboratory for Environmental Factors Control of Agro-product Quality Safety, Agro-Environmental Protection Institute, Ministry of Agriculture and Rural Affairs, Tianjin 300191, China. E-mail: liuwenjing@caas.cn

### Table of Contents

|                                                                   |    |
|-------------------------------------------------------------------|----|
| ◆ Computational Details                                           | S2 |
| ◆ Fig. S1                                                         | S3 |
| ◆ Energies and Cartesian Coordinates for the Optimized Structures | S4 |

## Computational Details

All of the calculations were performed with Gaussian 09 package. The B3LYP functional with a mixed basis set of SDD for Ni and 6-31G(d,p) for other atoms was used for geometry optimizations and frequency calculations. Frequency outcomes were scrutinized to confirm stationary points as minima (no imaginary frequencies) or transition states (one imaginary frequency). Because M06-L functional can give refined energies for transition-metal systems,<sup>[1]</sup> single-point energies were calculated using M06-L functional with a mixed basis set of SDD for Ni and 6-311++G(2d,p) for other atoms. The solvation effects were considered using the SMD model with Toluene ( $\epsilon = 2.3741$ ) as the solvent.

It should be emphasized that the thermal corrections based on the ideal gas phase model inevitably overestimate entropy contributions to free energies for reactions in solvent, in particular for reactions involving multicomponent change due to ignoring the suppressing effect of solvent on the rotational and translational freedoms of substrates. Since no standard quantum mechanics-based approach is available to accurately calculate entropy in solution, we adopted the approximate approach proposed by Martin et al.<sup>[2]</sup> According to their approach, a correction of 4.3 kcal/mol applies to per component change for a reaction at 298.15 K and 1 atm (i.e., a reaction from  $m$ - to  $n$ -components has an additional correction of  $(n - m) \times 4.3$  kcal/mol). This approach has been validated through a number of computational and experimental studies of transition metal-catalyzed reactions by Yu group,<sup>[3]</sup> Wang group<sup>[4]</sup> and Hong group.<sup>[5]</sup> In this paper, we discuss the mechanism in terms of the corrected free energies in the relevant figures.

- [1]. (a) Liu, Z.; Jin, X.; Dang, Y. *ACS Catal.* **2021**, *11*, 691. (b) Li, B.; Li, Y.; Dang, Y.; Houk, K. N. *ACS Catal.* **2021**, *11*, 6816. (c) Qi, X.; Kohler, D. G.; Hull, K. L.; Liu, P. *J. Am. Chem. Soc.* **2019**, *141*, 11892. (d) Shao, H.; Chakrabarty, S.; Qi, X.; Takacs, J. M.; Liu, P. *J. Am. Chem. Soc.* **2021**, *143*, 4801.
- [2]. Martin, R. L.; Hay, P. J.; Pratt, L. R. *J. Phys. Chem. A* **1998**, *102*, 3565.
- [3]. (a) Yu, Z. X.; Houk, K. N. *J. Am. Chem. Soc.* **2003**, *125*, 13825. (b) Chen, Y.; Ye, S.; Jiao, L.; Liang, Y.; Sinha-Mahapatra, D. K.; Herndon, J. W.; Yu, Z.-X. *J. Am. Chem. Soc.* **2007**, *129*, 10773. (c) Liang, Y.; Liu, S.; Xia, Y.; Li, Y.; Yu, Z.-X. *Chem. Eur. J.* **2008**, *14*, 4361.
- [4]. (a) Li, H.; Jiang, J.; Lu, G.; Huang, F.; Wang, Z.-X. *Organometallics* **2011**, *30*, 3131. (b) Li, H.; Wen, M.; Wang, Z.-X. *Inorg. Chem.* **2012**, *51*, 5716. (c) Qu, S.; Dang, Y.; Song, C.; Wen, M.; Huang, K.-W.; Wang, Z.-X. *J. Am. Chem. Soc.* **2014**, *136*, 4974.
- [5]. Chen, P.-P.; Lucas, E. L.; Greene, M. A.; Zhang, S.; Tollefson, E. J.; Erickson, L. E.; Taylor, B. L.; Jarvo, E. R.; Hong, X. *J. Am. Chem. Soc.* **2019**, *141*, 5835.

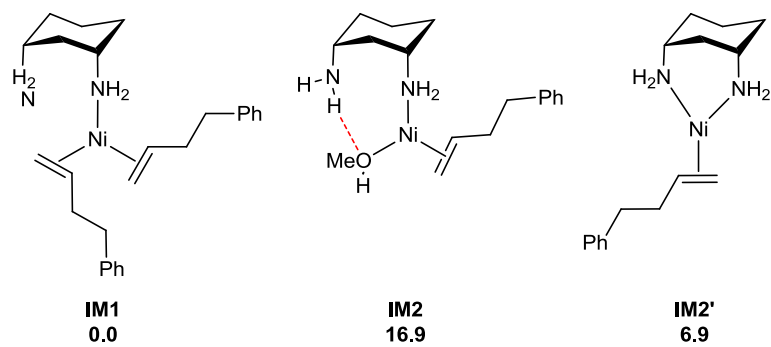

**Fig. S1** Possible complexes generated by initiation [Values are free energies in kcal/mol relative to **IM1**].

## Energies and Cartesian Coordinates (Å) for the Optimized Structures

IM1 (SCF energy in toluene: -1294.338972 a.u.; Free energy in toluene: -1293.813811 a.u.)

---

| Center<br>Number | Atomic<br>Number | Atomic<br>Type | Coordinates (Angstroms) |           |           |
|------------------|------------------|----------------|-------------------------|-----------|-----------|
|                  |                  |                | X                       | Y         | Z         |
| 1                | 28               | 0              | 0.118292                | -0.995191 | -0.720783 |
| 2                | 6                | 0              | 2.967503                | 6.154496  | 1.326962  |
| 3                | 6                | 0              | 1.628970                | 5.981402  | 0.968073  |
| 4                | 6                | 0              | 1.267606                | 4.972489  | 0.074641  |
| 5                | 6                | 0              | 2.231378                | 4.116225  | -0.478222 |
| 6                | 6                | 0              | 3.570953                | 4.303408  | -0.109104 |
| 7                | 6                | 0              | 3.938542                | 5.311405  | 0.783951  |
| 8                | 1                | 0              | 3.251251                | 6.942253  | 2.019144  |
| 9                | 1                | 0              | 0.865883                | 6.636236  | 1.380219  |
| 10               | 1                | 0              | 0.223604                | 4.848398  | -0.204350 |
| 11               | 1                | 0              | 4.334770                | 3.655414  | -0.533765 |
| 12               | 1                | 0              | 4.983944                | 5.441842  | 1.051032  |
| 13               | 6                | 0              | 1.828762                | 2.994755  | -1.409449 |
| 14               | 1                | 0              | 1.001864                | 3.316132  | -2.053538 |
| 15               | 1                | 0              | 2.665365                | 2.745929  | -2.074361 |
| 16               | 6                | 0              | 1.389489                | 1.709682  | -0.658266 |
| 17               | 1                | 0              | 0.533632                | 1.953997  | -0.016411 |
| 18               | 1                | 0              | 2.209680                | 1.422130  | 0.016596  |
| 19               | 6                | 0              | 1.028539                | 0.570249  | -1.591013 |
| 20               | 6                | 0              | -0.270268               | 0.392738  | -2.094464 |
| 21               | 1                | 0              | 1.862454                | 0.199710  | -2.193787 |
| 22               | 1                | 0              | -0.430903               | -0.083587 | -3.060166 |
| 23               | 1                | 0              | -1.072143               | 1.058901  | -1.778513 |
| 24               | 6                | 0              | -7.396814               | 1.154646  | 1.030279  |
| 25               | 6                | 0              | -6.651224               | 0.424052  | 1.957472  |
| 26               | 6                | 0              | -5.646499               | -0.441426 | 1.522517  |
| 27               | 6                | 0              | -5.365155               | -0.595904 | 0.157520  |
| 28               | 6                | 0              | -6.123289               | 0.143780  | -0.761430 |
| 29               | 6                | 0              | -7.129122               | 1.010913  | -0.332494 |
| 30               | 1                | 0              | -8.181825               | 1.826338  | 1.366185  |
| 31               | 1                | 0              | -6.855077               | 0.524365  | 3.020273  |
| 32               | 1                | 0              | -5.073539               | -1.011564 | 2.250549  |
| 33               | 1                | 0              | -5.924817               | 0.033207  | -1.825242 |
| 34               | 1                | 0              | -7.707161               | 1.570869  | -1.062845 |
| 35               | 6                | 0              | -4.246577               | -1.501724 | -0.307447 |
| 36               | 1                | 0              | -4.137825               | -2.347406 | 0.381655  |
| 37               | 1                | 0              | -4.497440               | -1.926218 | -1.287896 |

|    |   |   |           |           |           |
|----|---|---|-----------|-----------|-----------|
| 38 | 6 | 0 | -2.881966 | -0.771437 | -0.415268 |
| 39 | 1 | 0 | -2.621923 | -0.363263 | 0.569601  |
| 40 | 1 | 0 | -3.003983 | 0.087493  | -1.085947 |
| 41 | 6 | 0 | -1.776177 | -1.682254 | -0.907640 |
| 42 | 6 | 0 | -1.016675 | -2.476500 | -0.035205 |
| 43 | 1 | 0 | -1.906362 | -2.031825 | -1.933578 |
| 44 | 1 | 0 | -0.597885 | -3.424867 | -0.370664 |
| 45 | 1 | 0 | -1.166074 | -2.396519 | 1.043123  |
| 46 | 6 | 0 | 3.056728  | -1.713028 | -0.087174 |
| 47 | 6 | 0 | 3.013041  | -2.788972 | -1.185214 |
| 48 | 6 | 0 | 4.087195  | -2.089225 | 1.001967  |
| 49 | 6 | 0 | 2.795794  | -4.202584 | -0.625382 |
| 50 | 1 | 0 | 3.969487  | -2.760196 | -1.725328 |
| 51 | 1 | 0 | 2.226806  | -2.530974 | -1.902217 |
| 52 | 6 | 0 | 3.906342  | -3.510070 | 1.574024  |
| 53 | 1 | 0 | 5.092360  | -2.023343 | 0.566110  |
| 54 | 1 | 0 | 4.059105  | -1.351709 | 1.816498  |
| 55 | 6 | 0 | 3.849772  | -4.546473 | 0.437957  |
| 56 | 1 | 0 | 2.838858  | -4.933946 | -1.440455 |
| 57 | 1 | 0 | 1.792628  | -4.280152 | -0.191912 |
| 58 | 1 | 0 | 3.664908  | -5.543987 | 0.858494  |
| 59 | 1 | 0 | 4.842027  | -4.590259 | -0.030576 |
| 60 | 1 | 0 | 4.789179  | -3.737948 | 2.195503  |
| 61 | 1 | 0 | 3.364787  | -0.768117 | -0.546047 |
| 62 | 7 | 0 | 1.696226  | -1.475963 | 0.475450  |
| 63 | 1 | 0 | 1.473768  | -2.276157 | 1.072416  |
| 64 | 1 | 0 | 1.755019  | -0.679237 | 1.110636  |
| 65 | 7 | 0 | 2.657417  | -3.571969 | 2.363283  |
| 66 | 1 | 0 | 2.496372  | -4.524353 | 2.684167  |
| 67 | 1 | 0 | 2.750438  | -3.000567 | 3.200632  |

-----

**IM2** (SCF energy in toluene: -1021.730212 a.u.; Free energy in toluene: -1021.334793 a.u.)

-----

| Center<br>Number | Atomic<br>Number | Atomic<br>Type | Coordinates (Angstroms) |           |           |
|------------------|------------------|----------------|-------------------------|-----------|-----------|
|                  |                  |                | X                       | Y         | Z         |
| 1                | 28               | 0              | -0.998354               | -1.455364 | -0.283922 |
| 2                | 6                | 0              | 0.805934                | -1.698387 | -0.815481 |
| 3                | 6                | 0              | 0.349587                | -2.788710 | 0.026947  |
| 4                | 1                | 0              | 0.761900                | -2.864598 | 1.039362  |
| 5                | 1                | 0              | 0.184231                | -3.768633 | -0.431580 |
| 6                | 6                | 0              | -3.586921               | 1.661810  | 1.256928  |
| 7                | 6                | 0              | -4.067823               | 2.899386  | 0.475999  |
| 8                | 6                | 0              | -2.057112               | 1.514398  | 1.143457  |

|    |   |   |           |           |           |
|----|---|---|-----------|-----------|-----------|
| 9  | 6 | 0 | -3.590919 | 2.893721  | -0.984445 |
| 10 | 1 | 0 | -3.684824 | 3.794712  | 0.983992  |
| 11 | 1 | 0 | -5.163105 | 2.963857  | 0.520671  |
| 12 | 6 | 0 | -1.538330 | 1.509285  | -0.305794 |
| 13 | 1 | 0 | -1.594589 | 2.357693  | 1.670728  |
| 14 | 1 | 0 | -1.723584 | 0.600719  | 1.649451  |
| 15 | 6 | 0 | -2.064111 | 2.741110  | -1.071371 |
| 16 | 1 | 0 | -3.901188 | 3.819034  | -1.483321 |
| 17 | 1 | 0 | -4.080701 | 2.072799  | -1.520775 |
| 18 | 1 | 0 | -1.740791 | 2.692373  | -2.119672 |
| 19 | 1 | 0 | -1.586726 | 3.634419  | -0.645205 |
| 20 | 1 | 0 | -0.444598 | 1.549521  | -0.281635 |
| 21 | 1 | 0 | -3.827311 | 1.818988  | 2.322592  |
| 22 | 7 | 0 | -4.245038 | 0.451036  | 0.724532  |
| 23 | 1 | 0 | -3.905468 | -0.374396 | 1.216424  |
| 24 | 1 | 0 | -5.249241 | 0.506575  | 0.879068  |
| 25 | 7 | 0 | -1.893338 | 0.218938  | -0.967096 |
| 26 | 1 | 0 | -2.909604 | 0.108218  | -0.892008 |
| 27 | 1 | 0 | -1.653262 | 0.274953  | -1.955884 |
| 28 | 8 | 0 | -2.697565 | -2.291685 | 0.843389  |
| 29 | 6 | 0 | -3.577618 | -3.133182 | 0.084448  |
| 30 | 1 | 0 | -4.310122 | -2.477333 | -0.390571 |
| 31 | 1 | 0 | -3.033707 | -3.681526 | -0.691388 |
| 32 | 1 | 0 | -4.101916 | -3.839239 | 0.739893  |
| 33 | 6 | 0 | 1.861527  | -0.711619 | -0.346222 |
| 34 | 1 | 0 | 1.745013  | 0.252429  | -0.862869 |
| 35 | 1 | 0 | 1.737083  | -0.503728 | 0.724513  |
| 36 | 6 | 0 | 3.310765  | -1.212641 | -0.586670 |
| 37 | 1 | 0 | 3.441023  | -2.160632 | -0.051341 |
| 38 | 1 | 0 | 3.430472  | -1.436362 | -1.654424 |
| 39 | 6 | 0 | 4.366821  | -0.221975 | -0.152376 |
| 40 | 6 | 0 | 4.846316  | -0.209422 | 1.165720  |
| 41 | 6 | 0 | 4.865534  | 0.739025  | -1.044042 |
| 42 | 6 | 0 | 5.791006  | 0.730200  | 1.580578  |
| 43 | 1 | 0 | 4.477028  | -0.950442 | 1.871257  |
| 44 | 6 | 0 | 5.810355  | 1.681394  | -0.635245 |
| 45 | 1 | 0 | 4.512079  | 0.742038  | -2.072938 |
| 46 | 6 | 0 | 6.277159  | 1.680840  | 0.680605  |
| 47 | 1 | 0 | 6.151840  | 0.716925  | 2.605749  |
| 48 | 1 | 0 | 6.186322  | 2.412798  | -1.345986 |
| 49 | 1 | 0 | 7.015808  | 2.410681  | 1.000184  |
| 50 | 1 | 0 | 0.884550  | -1.911853 | -1.889161 |
| 51 | 1 | 0 | -1.926566 | -2.817547 | 1.127316  |

TS1 (SCF energy in toluene: -1544.627881 a.u.; Free energy in toluene: -1544.087746 a.u.)

| Center<br>Number | Atomic<br>Number | Atomic<br>Type | Coordinates (Angstroms) |           |           |
|------------------|------------------|----------------|-------------------------|-----------|-----------|
|                  |                  |                | X                       | Y         | Z         |
| 1                | 28               | 0              | 0.593404                | 0.292331  | 0.362129  |
| 2                | 6                | 0              | 2.233607                | -0.165091 | 1.150412  |
| 3                | 6                | 0              | 1.205438                | -1.072298 | 1.689381  |
| 4                | 1                | 0              | 1.021933                | -0.986491 | 2.765573  |
| 5                | 1                | 0              | 1.293168                | -2.122874 | 1.390191  |
| 6                | 6                | 0              | -0.700250               | 4.268385  | 0.393107  |
| 7                | 6                | 0              | -0.425128               | 5.311954  | -0.705066 |
| 8                | 6                | 0              | 0.613914                | 3.611293  | 0.864002  |
| 9                | 6                | 0              | 0.422381                | 4.762864  | -1.861569 |
| 10               | 1                | 0              | 0.102920                | 6.157272  | -0.243835 |
| 11               | 1                | 0              | -1.375571               | 5.712875  | -1.080985 |
| 12               | 6                | 0              | 1.512929                | 3.080838  | -0.268352 |
| 13               | 1                | 0              | 1.187418                | 4.366535  | 1.416242  |
| 14               | 1                | 0              | 0.397400                | 2.797682  | 1.565477  |
| 15               | 6                | 0              | 1.739429                | 4.164015  | -1.341727 |
| 16               | 1                | 0              | 0.637020                | 5.561434  | -2.580585 |
| 17               | 1                | 0              | -0.148057               | 4.004708  | -2.412284 |
| 18               | 1                | 0              | 2.332101                | 3.752349  | -2.169187 |
| 19               | 1                | 0              | 2.346617                | 4.963928  | -0.896542 |
| 20               | 1                | 0              | 2.477327                | 2.797978  | 0.165711  |
| 21               | 1                | 0              | -1.122865               | 4.805142  | 1.258368  |
| 22               | 7                | 0              | -1.647790               | 3.236877  | -0.088357 |
| 23               | 1                | 0              | -1.987857               | 2.692278  | 0.711431  |
| 24               | 1                | 0              | -2.466354               | 3.695031  | -0.485756 |
| 25               | 7                | 0              | 0.950013                | 1.825762  | -0.849379 |
| 26               | 1                | 0              | 0.059806                | 2.059574  | -1.290688 |
| 27               | 1                | 0              | 1.572723                | 1.497030  | -1.587529 |
| 28               | 5                | 0              | -2.324250               | -0.167879 | 0.842258  |
| 29               | 8                | 0              | -1.343720               | 0.272827  | -0.189407 |
| 30               | 1                | 0              | -1.573940               | 1.180019  | -0.453670 |
| 31               | 8                | 0              | -1.480515               | -1.271341 | 1.537771  |
| 32               | 6                | 0              | -3.678413               | -0.820042 | 0.251323  |
| 33               | 6                | 0              | -3.738599               | -2.147898 | -0.197677 |
| 34               | 6                | 0              | -4.860706               | -0.066629 | 0.113120  |
| 35               | 6                | 0              | -4.895712               | -2.708544 | -0.747948 |
| 36               | 1                | 0              | -2.851235               | -2.770828 | -0.114756 |
| 37               | 6                | 0              | -6.027008               | -0.595503 | -0.430817 |
| 38               | 1                | 0              | -4.870430               | 0.974362  | 0.433781  |
| 39               | 6                | 0              | -6.050669               | -1.926909 | -0.865974 |

|    |   |   |           |           |           |
|----|---|---|-----------|-----------|-----------|
| 40 | 1 | 0 | -4.885441 | -3.741674 | -1.077302 |
| 41 | 1 | 0 | -6.930367 | -0.001255 | -0.531416 |
| 42 | 8 | 0 | -2.549264 | 0.960042  | 1.740198  |
| 43 | 1 | 0 | -3.415778 | 0.898466  | 2.155641  |
| 44 | 6 | 0 | -1.884612 | -1.714312 | 2.831024  |
| 45 | 1 | 0 | -1.173236 | -2.468521 | 3.176379  |
| 46 | 1 | 0 | -1.916184 | -0.881220 | 3.541372  |
| 47 | 1 | 0 | -2.877838 | -2.166961 | 2.755153  |
| 48 | 8 | 0 | -7.240615 | -2.364204 | -1.385524 |
| 49 | 6 | 0 | -7.312955 | -3.699226 | -1.852129 |
| 50 | 1 | 0 | -7.123985 | -4.423695 | -1.048580 |
| 51 | 1 | 0 | -8.330133 | -3.836389 | -2.224018 |
| 52 | 1 | 0 | -6.603513 | -3.884972 | -2.669598 |
| 53 | 1 | 0 | -0.313013 | -0.994001 | 1.449187  |
| 54 | 6 | 0 | 3.341773  | -0.707352 | 0.261361  |
| 55 | 1 | 0 | 3.779683  | 0.102853  | -0.340673 |
| 56 | 1 | 0 | 2.932125  | -1.433598 | -0.453130 |
| 57 | 6 | 0 | 4.489078  | -1.388824 | 1.053528  |
| 58 | 1 | 0 | 4.896360  | -0.666786 | 1.772712  |
| 59 | 1 | 0 | 4.062594  | -2.209984 | 1.642187  |
| 60 | 6 | 0 | 5.598969  | -1.910943 | 0.169428  |
| 61 | 6 | 0 | 5.516732  | -3.185283 | -0.410866 |
| 62 | 6 | 0 | 6.719586  | -1.121777 | -0.126365 |
| 63 | 6 | 0 | 6.519358  | -3.656405 | -1.259146 |
| 64 | 1 | 0 | 4.658217  | -3.815383 | -0.189092 |
| 65 | 6 | 0 | 7.726001  | -1.587779 | -0.973917 |
| 66 | 1 | 0 | 6.805791  | -0.133262 | 0.319724  |
| 67 | 6 | 0 | 7.629151  | -2.858230 | -1.544441 |
| 68 | 1 | 0 | 6.436878  | -4.649221 | -1.693415 |
| 69 | 1 | 0 | 8.588459  | -0.960757 | -1.184196 |
| 70 | 1 | 0 | 8.413042  | -3.224892 | -2.201150 |
| 71 | 1 | 0 | 2.601740  | 0.592481  | 1.854074  |

-----  
**TS1a** (SCF energy in toluene: -633.33712 a.u.; Free energy in toluene: -633.121076 a.u.)  
 -----

| Center<br>Number | Atomic<br>Number | Atomic<br>Type | Coordinates (Angstroms) |           |           |
|------------------|------------------|----------------|-------------------------|-----------|-----------|
|                  |                  |                | X                       | Y         | Z         |
| 1                | 6                | 0              | -1.548839               | 1.111675  | -1.020353 |
| 2                | 6                | 0              | -1.856254               | 1.743002  | 0.349338  |
| 3                | 6                | 0              | -2.131919               | -0.313083 | -1.111963 |
| 4                | 6                | 0              | -1.425522               | 0.852832  | 1.523043  |
| 5                | 1                | 0              | -2.937893               | 1.926608  | 0.402972  |
| 6                | 1                | 0              | -1.374451               | 2.727298  | 0.413781  |



|    |    |   |           |           |           |
|----|----|---|-----------|-----------|-----------|
| 7  | 6  | 0 | -1.796644 | -1.234084 | 0.076653  |
| 8  | 1  | 0 | -3.224362 | -0.228218 | -1.166346 |
| 9  | 1  | 0 | -1.814683 | -0.786914 | -2.050671 |
| 10 | 6  | 0 | -2.069826 | -0.535960 | 1.419626  |
| 11 | 1  | 0 | -1.708545 | 1.322380  | 2.472090  |
| 12 | 1  | 0 | -0.333244 | 0.745065  | 1.525705  |
| 13 | 1  | 0 | -1.735202 | -1.179431 | 2.243182  |
| 14 | 1  | 0 | -3.159110 | -0.441130 | 1.525655  |
| 15 | 1  | 0 | -2.462296 | -2.108316 | 0.012946  |
| 16 | 1  | 0 | -2.047365 | 1.722331  | -1.791883 |
| 17 | 7  | 0 | -0.091379 | 1.065285  | -1.236530 |
| 18 | 1  | 0 | 0.330750  | 1.979259  | -1.087372 |
| 19 | 1  | 0 | 0.124803  | 0.797639  | -2.194734 |
| 20 | 7  | 0 | -0.388184 | -1.722889 | 0.007212  |
| 21 | 1  | 0 | -0.181481 | -2.293073 | 0.826408  |
| 22 | 1  | 0 | -0.281602 | -2.347583 | -0.795183 |
| 23 | 28 | 0 | 1.146488  | -0.555774 | -0.185590 |
| 24 | 8  | 0 | 2.925343  | 0.097720  | -0.270773 |
| 25 | 1  | 0 | 2.619625  | -0.997088 | 0.145098  |
| 26 | 6  | 0 | 3.399577  | 0.903618  | 0.800641  |
| 27 | 1  | 0 | 4.459248  | 1.134731  | 0.627205  |
| 28 | 1  | 0 | 2.848886  | 1.851656  | 0.869383  |
| 29 | 1  | 0 | 3.306009  | 0.389947  | 1.767794  |

-----  
**TS1b** (SCF energy in toluene: -1021.700706 a.u.; Free energy in toluene: -1021.307407 a.u.)  
 -----

| Center<br>Number | Atomic<br>Number | Atomic<br>Type | Coordinates (Angstroms) |           |           |
|------------------|------------------|----------------|-------------------------|-----------|-----------|
|                  |                  |                | X                       | Y         | Z         |
| 1                | 28               | 0              | -1.018070               | -0.170181 | -0.263213 |
| 2                | 6                | 0              | 0.631651                | -0.771006 | 0.599423  |
| 3                | 6                | 0              | -0.000880               | -1.830833 | -0.120691 |
| 4                | 1                | 0              | 0.485249                | -0.749637 | 1.686444  |
| 5                | 1                | 0              | -0.541789               | -2.616311 | 0.412299  |
| 6                | 1                | 0              | 0.445812                | -2.173070 | -1.055339 |
| 7                | 6                | 0              | 1.977207                | -0.208379 | 0.181608  |
| 8                | 1                | 0              | 2.072259                | 0.840976  | 0.487585  |
| 9                | 1                | 0              | 2.061121                | -0.222332 | -0.911679 |
| 10               | 6                | 0              | 3.164305                | -1.003721 | 0.785391  |
| 11               | 1                | 0              | 3.079371                | -0.990545 | 1.879792  |
| 12               | 1                | 0              | 3.072014                | -2.052037 | 0.476557  |
| 13               | 6                | 0              | 4.514925                | -0.462039 | 0.373653  |
| 14               | 6                | 0              | 5.165800                | 0.516005  | 1.139026  |
| 15               | 6                | 0              | 5.133476                | -0.896360 | -0.807641 |

|    |   |   |           |           |           |
|----|---|---|-----------|-----------|-----------|
| 16 | 6 | 0 | 6.393792  | 1.044893  | 0.738543  |
| 17 | 1 | 0 | 4.705441  | 0.862007  | 2.061945  |
| 18 | 6 | 0 | 6.361129  | -0.371376 | -1.213185 |
| 19 | 1 | 0 | 4.647078  | -1.658901 | -1.412055 |
| 20 | 6 | 0 | 6.996542  | 0.602820  | -0.440556 |
| 21 | 1 | 0 | 6.882066  | 1.799212  | 1.349887  |
| 22 | 1 | 0 | 6.823912  | -0.726176 | -2.130293 |
| 23 | 1 | 0 | 7.954015  | 1.010605  | -0.752332 |
| 24 | 6 | 0 | -4.719201 | 0.752396  | -1.064543 |
| 25 | 6 | 0 | -4.305222 | 1.480972  | 0.221108  |
| 26 | 6 | 0 | -4.558600 | 0.589127  | 1.443248  |
| 27 | 6 | 0 | -3.847461 | -0.770666 | 1.348603  |
| 28 | 6 | 0 | -4.176808 | -1.482000 | 0.020288  |
| 29 | 6 | 0 | -4.028981 | -0.611308 | -1.243789 |
| 30 | 1 | 0 | -4.253238 | 1.096807  | 2.368027  |
| 31 | 1 | 0 | -3.248225 | 1.761179  | 0.154986  |
| 32 | 1 | 0 | -4.882652 | 2.408066  | 0.316547  |
| 33 | 1 | 0 | -5.803008 | 0.571272  | -1.049736 |
| 34 | 1 | 0 | -4.523531 | 1.379529  | -1.943348 |
| 35 | 1 | 0 | -4.231863 | -1.404109 | 2.163660  |
| 36 | 1 | 0 | -3.562977 | -2.386157 | -0.078723 |
| 37 | 1 | 0 | -5.219921 | -1.819035 | 0.072554  |
| 38 | 1 | 0 | -4.546825 | -1.135049 | -2.061408 |
| 39 | 1 | 0 | -5.635794 | 0.396490  | 1.542203  |
| 40 | 7 | 0 | -2.597415 | -0.444679 | -1.622310 |
| 41 | 1 | 0 | -2.290202 | -1.255712 | -2.152676 |
| 42 | 1 | 0 | -2.495562 | 0.364747  | -2.232818 |
| 43 | 7 | 0 | -2.380909 | -0.600861 | 1.495044  |
| 44 | 1 | 0 | -2.183173 | 0.081210  | 2.224759  |
| 45 | 1 | 0 | -1.968511 | -1.477524 | 1.806041  |
| 46 | 8 | 0 | -1.160007 | 1.799628  | -0.673758 |
| 47 | 1 | 0 | -0.358193 | 0.740314  | -1.182834 |
| 48 | 6 | 0 | -0.307319 | 2.746477  | -0.072363 |
| 49 | 1 | 0 | -0.698066 | 3.757242  | -0.265176 |
| 50 | 1 | 0 | -0.234588 | 2.621660  | 1.020905  |
| 51 | 1 | 0 | 0.717930  | 2.712090  | -0.473647 |

-----  
**TS1c** (SCF energy in toluene: -1021.70899 a.u.; Free energy in toluene: -1021.31457 a.u.)  
 -----

| Center<br>Number | Atomic<br>Number | Atomic<br>Type | Coordinates (Angstroms) |          |           |
|------------------|------------------|----------------|-------------------------|----------|-----------|
|                  |                  |                | X                       | Y        | Z         |
| 1                | 28               | 0              | 1.057104                | 1.316539 | -0.395797 |
| 2                | 6                | 0              | -0.743328               | 1.598315 | -0.893142 |

|    |   |   |           |           |           |
|----|---|---|-----------|-----------|-----------|
| 3  | 6 | 0 | -0.301775 | 2.681419  | 0.028728  |
| 4  | 1 | 0 | -0.797312 | 2.699903  | 1.004859  |
| 5  | 1 | 0 | -0.234071 | 3.682838  | -0.405506 |
| 6  | 6 | 0 | 3.488195  | -1.437367 | 1.323354  |
| 7  | 6 | 0 | 4.158893  | -2.667873 | 0.682520  |
| 8  | 6 | 0 | 1.969408  | -1.470384 | 1.063354  |
| 9  | 6 | 0 | 3.841327  | -2.791814 | -0.815905 |
| 10 | 1 | 0 | 3.808874  | -3.565946 | 1.209470  |
| 11 | 1 | 0 | 5.244792  | -2.621678 | 0.836660  |
| 12 | 6 | 0 | 1.609491  | -1.574847 | -0.429474 |
| 13 | 1 | 0 | 1.549134  | -2.343018 | 1.578008  |
| 14 | 1 | 0 | 1.493363  | -0.583336 | 1.496734  |
| 15 | 6 | 0 | 2.324895  | -2.778920 | -1.074888 |
| 16 | 1 | 0 | 4.273874  | -3.715754 | -1.216636 |
| 17 | 1 | 0 | 4.321141  | -1.966863 | -1.354574 |
| 18 | 1 | 0 | 2.117797  | -2.802170 | -2.153265 |
| 19 | 1 | 0 | 1.878921  | -3.692433 | -0.658406 |
| 20 | 1 | 0 | 0.527044  | -1.712734 | -0.521930 |
| 21 | 1 | 0 | 3.638467  | -1.497016 | 2.415130  |
| 22 | 7 | 0 | 4.058035  | -0.203577 | 0.753725  |
| 23 | 1 | 0 | 3.565709  | 0.623711  | 1.106514  |
| 24 | 1 | 0 | 5.038696  | -0.118301 | 1.008716  |
| 25 | 7 | 0 | 1.926256  | -0.283365 | -1.117377 |
| 26 | 1 | 0 | 2.931605  | -0.111827 | -0.978340 |
| 27 | 1 | 0 | 1.743645  | -0.379267 | -2.115170 |
| 28 | 8 | 0 | 2.320099  | 2.289922  | 0.893493  |
| 29 | 1 | 0 | 1.036330  | 2.603265  | 0.559575  |
| 30 | 6 | 0 | 3.208873  | 3.237544  | 0.337013  |
| 31 | 1 | 0 | 4.036340  | 2.749502  | -0.204137 |
| 32 | 1 | 0 | 2.710794  | 3.917064  | -0.374492 |
| 33 | 1 | 0 | 3.651108  | 3.860651  | 1.129214  |
| 34 | 6 | 0 | -1.820231 | 0.622681  | -0.449365 |
| 35 | 1 | 0 | -1.760253 | -0.298044 | -1.046320 |
| 36 | 1 | 0 | -1.655551 | 0.323882  | 0.594205  |
| 37 | 6 | 0 | -3.260290 | 1.187120  | -0.576454 |
| 38 | 1 | 0 | -3.328021 | 2.106356  | 0.017759  |
| 39 | 1 | 0 | -3.433960 | 1.474992  | -1.621013 |
| 40 | 6 | 0 | -4.322136 | 0.206997  | -0.130517 |
| 41 | 6 | 0 | -4.727114 | 0.146357  | 1.210826  |
| 42 | 6 | 0 | -4.898117 | -0.695252 | -1.036293 |
| 43 | 6 | 0 | -5.675358 | -0.785234 | 1.635429  |
| 44 | 1 | 0 | -4.297117 | 0.842354  | 1.927802  |
| 45 | 6 | 0 | -5.847160 | -1.629028 | -0.617474 |
| 46 | 1 | 0 | -4.603133 | -0.659453 | -2.082803 |

|    |   |   |           |           |           |
|----|---|---|-----------|-----------|-----------|
| 47 | 6 | 0 | -6.239129 | -1.677866 | 0.721639  |
| 48 | 1 | 0 | -5.977857 | -0.810632 | 2.678920  |
| 49 | 1 | 0 | -6.284575 | -2.315037 | -1.338011 |
| 50 | 1 | 0 | -6.980457 | -2.401322 | 1.049090  |
| 51 | 1 | 0 | -0.863736 | 1.905346  | -1.938217 |

-----  
**TS1d** (SCF energy in toluene: -1544.625592 a.u; Free energy in toluene: -1544.08528 a.u.)  
 -----

| Center<br>Number | Atomic<br>Number | Atomic<br>Type | Coordinates (Angstroms) |           |           |
|------------------|------------------|----------------|-------------------------|-----------|-----------|
|                  |                  |                | X                       | Y         | Z         |
| 1                | 28               | 0              | 0.524934                | -1.571045 | 0.021455  |
| 2                | 6                | 0              | -0.511852               | -3.035153 | 0.560102  |
| 3                | 6                | 0              | -1.197400               | -1.822512 | 1.025801  |
| 4                | 1                | 0              | -1.256090               | -1.749897 | 2.121023  |
| 5                | 6                | 0              | 4.761736                | -1.509511 | 0.413820  |
| 6                | 6                | 0              | 5.739225                | -2.121676 | -0.606792 |
| 7                | 6                | 0              | 3.694095                | -2.538481 | 0.839680  |
| 8                | 6                | 0              | 5.036679                | -2.795983 | -1.794304 |
| 9                | 1                | 0              | 6.348524                | -2.869028 | -0.081070 |
| 10               | 1                | 0              | 6.436794                | -1.350554 | -0.959288 |
| 11               | 6                | 0              | 2.989540                | -3.250577 | -0.329317 |
| 12               | 1                | 0              | 4.188586                | -3.307630 | 1.446316  |
| 13               | 1                | 0              | 2.945983                | -2.057611 | 1.479640  |
| 14               | 6                | 0              | 4.021334                | -3.843173 | -1.308863 |
| 15               | 1                | 0              | 5.778264                | -3.271107 | -2.446298 |
| 16               | 1                | 0              | 4.535550                | -2.036601 | -2.407605 |
| 17               | 1                | 0              | 3.505222                | -4.306779 | -2.159932 |
| 18               | 1                | 0              | 4.556488                | -4.652979 | -0.794506 |
| 19               | 1                | 0              | 2.373935                | -4.057779 | 0.079289  |
| 20               | 1                | 0              | 5.345676                | -1.255209 | 1.313876  |
| 21               | 7                | 0              | 4.105939                | -0.299867 | -0.135381 |
| 22               | 1                | 0              | 3.627503                | 0.185855  | 0.630918  |
| 23               | 1                | 0              | 4.819329                | 0.340511  | -0.480105 |
| 24               | 7                | 0              | 2.040937                | -2.325341 | -1.017677 |
| 25               | 1                | 0              | 2.586293                | -1.543005 | -1.383273 |
| 26               | 1                | 0              | 1.629504                | -2.809853 | -1.815283 |
| 27               | 5                | 0              | 0.976971                | 1.276825  | 0.783705  |
| 28               | 8                | 0              | 1.136842                | 0.312180  | -0.340569 |
| 29               | 1                | 0              | 2.075698                | 0.284049  | -0.585385 |
| 30               | 8                | 0              | -0.364137               | 0.746603  | 1.372083  |
| 31               | 6                | 0              | 0.785933                | 2.817988  | 0.343288  |
| 32               | 6                | 0              | -0.438520               | 3.314836  | -0.128606 |
| 33               | 6                | 0              | 1.853988                | 3.736002  | 0.376288  |

|    |   |   |           |           |           |
|----|---|---|-----------|-----------|-----------|
| 34 | 6 | 0 | -0.608517 | 4.640200  | -0.540494 |
| 35 | 1 | 0 | -1.294319 | 2.645814  | -0.174554 |
| 36 | 6 | 0 | 1.716257  | 5.060546  | -0.026884 |
| 37 | 1 | 0 | 2.832857  | 3.405419  | 0.721844  |
| 38 | 6 | 0 | 0.477023  | 5.522295  | -0.489081 |
| 39 | 1 | 0 | -1.578994 | 4.969847  | -0.894406 |
| 40 | 1 | 0 | 2.549627  | 5.756076  | 0.004927  |
| 41 | 8 | 0 | 2.079057  | 1.055894  | 1.712362  |
| 42 | 1 | 0 | 2.257912  | 1.851621  | 2.224518  |
| 43 | 6 | 0 | -0.706167 | 1.100632  | 2.710235  |
| 44 | 1 | 0 | -1.664329 | 0.637065  | 2.956732  |
| 45 | 1 | 0 | 0.061582  | 0.766219  | 3.415539  |
| 46 | 1 | 0 | -0.809694 | 2.188267  | 2.770203  |
| 47 | 8 | 0 | 0.431323  | 6.839631  | -0.861552 |
| 48 | 6 | 0 | -0.796998 | 7.352662  | -1.345339 |
| 49 | 1 | 0 | -1.591558 | 7.290679  | -0.589669 |
| 50 | 1 | 0 | -0.614264 | 8.401770  | -1.585538 |
| 51 | 1 | 0 | -1.129293 | 6.828952  | -2.251516 |
| 52 | 1 | 0 | -0.493309 | -0.410395 | 1.102307  |
| 53 | 1 | 0 | -0.066112 | -3.693300 | 1.310878  |
| 54 | 6 | 0 | -2.522335 | -1.437489 | 0.361824  |
| 55 | 1 | 0 | -2.750938 | -0.377277 | 0.532573  |
| 56 | 1 | 0 | -2.427984 | -1.551787 | -0.725510 |
| 57 | 6 | 0 | -3.718445 | -2.288252 | 0.851682  |
| 58 | 1 | 0 | -3.483540 | -3.346812 | 0.688277  |
| 59 | 1 | 0 | -3.828042 | -2.156054 | 1.936108  |
| 60 | 1 | 0 | -0.975258 | -3.595773 | -0.258847 |
| 61 | 6 | 0 | -5.017480 | -1.937128 | 0.160737  |
| 62 | 6 | 0 | -5.878367 | -0.963931 | 0.687468  |
| 63 | 6 | 0 | -5.374331 | -2.548907 | -1.049723 |
| 64 | 6 | 0 | -7.056278 | -0.610454 | 0.027332  |
| 65 | 1 | 0 | -5.623172 | -0.481722 | 1.628639  |
| 66 | 6 | 0 | -6.550397 | -2.199693 | -1.714505 |
| 67 | 1 | 0 | -4.722911 | -3.311195 | -1.471569 |
| 68 | 6 | 0 | -7.396731 | -1.227345 | -1.177841 |
| 69 | 1 | 0 | -7.710393 | 0.143881  | 0.456577  |
| 70 | 1 | 0 | -6.808407 | -2.690016 | -2.649467 |
| 71 | 1 | 0 | -8.314510 | -0.955915 | -1.691869 |

-----  
**IM3** (SCF energy in toluene: -1544.663468 a.u.; Free energy in toluene: -1544.11863 a.u.)  
 -----

| Center<br>Number | Atomic<br>Number | Atomic<br>Type | Coordinates (Angstroms) |   |   |
|------------------|------------------|----------------|-------------------------|---|---|
|                  |                  |                | X                       | Y | Z |

-----

|    |    |   |           |           |           |
|----|----|---|-----------|-----------|-----------|
| 1  | 28 | 0 | 0.338226  | 0.971493  | -0.021015 |
| 2  | 6  | 0 | 2.182338  | 1.044547  | 0.568843  |
| 3  | 6  | 0 | 2.332808  | 1.435190  | 2.044247  |
| 4  | 1  | 0 | 3.384997  | 1.511319  | 2.357980  |
| 5  | 1  | 0 | 1.855590  | 0.707449  | 2.709217  |
| 6  | 6  | 0 | -1.804764 | 4.485281  | 0.459888  |
| 7  | 6  | 0 | -1.796441 | 5.654300  | -0.542612 |
| 8  | 6  | 0 | -0.369920 | 4.108598  | 0.882139  |
| 9  | 6  | 0 | -0.842313 | 5.433600  | -1.724765 |
| 10 | 1  | 0 | -1.492086 | 6.560869  | -0.002519 |
| 11 | 1  | 0 | -2.816963 | 5.839792  | -0.901845 |
| 12 | 6  | 0 | 0.636787  | 3.935189  | -0.271790 |
| 13 | 1  | 0 | 0.012241  | 4.913836  | 1.522190  |
| 14 | 1  | 0 | -0.389357 | 3.200564  | 1.494395  |
| 15 | 6  | 0 | 0.583504  | 5.138608  | -1.232417 |
| 16 | 1  | 0 | -0.834115 | 6.319731  | -2.369166 |
| 17 | 1  | 0 | -1.209638 | 4.609383  | -2.349033 |
| 18 | 1  | 0 | 1.261992  | 4.972822  | -2.079505 |
| 19 | 1  | 0 | 0.968607  | 6.017015  | -0.697559 |
| 20 | 1  | 0 | 1.638895  | 3.863051  | 0.160859  |
| 21 | 1  | 0 | -2.323350 | 4.835655  | 1.367625  |
| 22 | 7  | 0 | -2.496063 | 3.307168  | -0.108353 |
| 23 | 1  | 0 | -2.633457 | 2.611761  | 0.632717  |
| 24 | 1  | 0 | -3.426925 | 3.583389  | -0.416556 |
| 25 | 7  | 0 | 0.425684  | 2.646880  | -1.003728 |
| 26 | 1  | 0 | -0.486080 | 2.685187  | -1.462119 |
| 27 | 1  | 0 | 1.128967  | 2.569714  | -1.739401 |
| 28 | 5  | 0 | -1.841692 | -0.245001 | 0.488948  |
| 29 | 8  | 0 | -1.490122 | 0.581155  | -0.725858 |
| 30 | 1  | 0 | -2.037559 | 1.383741  | -0.750825 |
| 31 | 8  | 0 | -0.388212 | -0.588033 | 0.882573  |
| 32 | 6  | 0 | -2.701782 | -1.573481 | 0.188686  |
| 33 | 6  | 0 | -4.097829 | -1.591137 | 0.313602  |
| 34 | 6  | 0 | -2.103850 | -2.768162 | -0.261665 |
| 35 | 6  | 0 | -4.874499 | -2.717951 | 0.018132  |
| 36 | 1  | 0 | -4.615144 | -0.690191 | 0.641865  |
| 37 | 6  | 0 | -2.847471 | -3.903604 | -0.560800 |
| 38 | 1  | 0 | -1.023406 | -2.801921 | -0.377789 |
| 39 | 6  | 0 | -4.242952 | -3.885065 | -0.421964 |
| 40 | 1  | 0 | -5.952074 | -2.672568 | 0.130713  |
| 41 | 1  | 0 | -2.375057 | -4.818863 | -0.905153 |
| 42 | 8  | 0 | -2.454939 | 0.667606  | 1.450160  |
| 43 | 1  | 0 | -3.065281 | 0.196805  | 2.026374  |
| 44 | 6  | 0 | -0.173532 | -1.101304 | 2.186300  |

|    |   |   |           |           |           |
|----|---|---|-----------|-----------|-----------|
| 45 | 1 | 0 | -0.416257 | -0.359251 | 2.956583  |
| 46 | 1 | 0 | -0.805205 | -1.985673 | 2.332539  |
| 47 | 1 | 0 | 0.871957  | -1.400028 | 2.288482  |
| 48 | 8 | 0 | -4.889989 | -5.050646 | -0.740126 |
| 49 | 6 | 0 | -6.300626 | -5.079184 | -0.630068 |
| 50 | 1 | 0 | -6.776924 | -4.343116 | -1.291811 |
| 51 | 1 | 0 | -6.609364 | -6.082136 | -0.931169 |
| 52 | 1 | 0 | -6.634295 | -4.895415 | 0.400302  |
| 53 | 6 | 0 | 2.852912  | -0.292257 | 0.210874  |
| 54 | 1 | 0 | 2.616774  | -0.561304 | -0.827442 |
| 55 | 1 | 0 | 2.443739  | -1.103472 | 0.825651  |
| 56 | 6 | 0 | 4.398865  | -0.302840 | 0.357297  |
| 57 | 1 | 0 | 4.816062  | 0.505066  | -0.258272 |
| 58 | 1 | 0 | 4.669895  | -0.077667 | 1.395013  |
| 59 | 6 | 0 | 5.016778  | -1.622237 | -0.048488 |
| 60 | 6 | 0 | 5.204366  | -2.648990 | 0.887982  |
| 61 | 6 | 0 | 5.378947  | -1.869068 | -1.380562 |
| 62 | 6 | 0 | 5.733962  | -3.882886 | 0.507652  |
| 63 | 1 | 0 | 4.935193  | -2.475735 | 1.927675  |
| 64 | 6 | 0 | 5.909231  | -3.100666 | -1.766854 |
| 65 | 1 | 0 | 5.247068  | -1.083458 | -2.121502 |
| 66 | 6 | 0 | 6.088320  | -4.113733 | -0.822913 |
| 67 | 1 | 0 | 5.873473  | -4.662959 | 1.251351  |
| 68 | 1 | 0 | 6.186264  | -3.268010 | -2.804313 |
| 69 | 1 | 0 | 6.503146  | -5.072577 | -1.120688 |
| 70 | 1 | 0 | 2.673098  | 1.825865  | -0.038095 |
| 71 | 1 | 0 | 1.874446  | 2.409054  | 2.253027  |

-----  
**TS2** (SCF energy in toluene: -1544.643897 a.u.; Free energy in toluene: -1544.098301 a.u.)  
 -----

| Center<br>Number | Atomic<br>Number | Atomic<br>Type | Coordinates (Angstroms) |           |           |
|------------------|------------------|----------------|-------------------------|-----------|-----------|
|                  |                  |                | X                       | Y         | Z         |
| 1                | 28               | 0              | 1.038141                | -0.061273 | -0.233276 |
| 2                | 6                | 0              | -0.089815               | -1.397549 | 0.646819  |
| 3                | 6                | 0              | 0.055971                | -1.360535 | 2.175348  |
| 4                | 1                | 0              | -0.431272               | -2.214935 | 2.669693  |
| 5                | 1                | 0              | -0.390602               | -0.451851 | 2.591493  |
| 6                | 6                | 0              | 5.114449                | -0.448233 | 0.777938  |
| 7                | 6                | 0              | 6.096566                | -1.365139 | 0.026664  |
| 8                | 6                | 0              | 3.876025                | -1.227685 | 1.263967  |
| 9                | 6                | 0              | 5.427760                | -2.228652 | -1.051654 |
| 10               | 1                | 0              | 6.568535                | -2.026365 | 0.765624  |
| 11               | 1                | 0              | 6.906655                | -0.763982 | -0.406477 |

|    |   |   |           |           |           |
|----|---|---|-----------|-----------|-----------|
| 12 | 6 | 0 | 3.220964  | -2.167091 | 0.231999  |
| 13 | 1 | 0 | 4.191239  | -1.855510 | 2.107049  |
| 14 | 1 | 0 | 3.128004  | -0.528893 | 1.652032  |
| 15 | 6 | 0 | 4.278113  | -3.055012 | -0.453055 |
| 16 | 1 | 0 | 6.167474  | -2.896055 | -1.507595 |
| 17 | 1 | 0 | 5.058517  | -1.589026 | -1.864110 |
| 18 | 1 | 0 | 3.802738  | -3.676585 | -1.222834 |
| 19 | 1 | 0 | 4.685950  | -3.747358 | 0.295505  |
| 20 | 1 | 0 | 2.510598  | -2.800987 | 0.770866  |
| 21 | 1 | 0 | 5.635556  | -0.081733 | 1.676811  |
| 22 | 7 | 0 | 4.698099  | 0.701258  | -0.060882 |
| 23 | 1 | 0 | 4.226907  | 1.382788  | 0.541991  |
| 24 | 1 | 0 | 5.524500  | 1.166007  | -0.433591 |
| 25 | 7 | 0 | 2.397410  | -1.429930 | -0.773353 |
| 26 | 1 | 0 | 3.018772  | -0.931862 | -1.409595 |
| 27 | 1 | 0 | 1.899954  | -2.117092 | -1.340420 |
| 28 | 5 | 0 | 1.678405  | 2.333297  | -0.223431 |
| 29 | 8 | 0 | 2.156770  | 1.332241  | -1.161928 |
| 30 | 1 | 0 | 3.098199  | 1.110727  | -0.967151 |
| 31 | 6 | 0 | -0.170909 | 1.512301  | 0.112860  |
| 32 | 6 | 0 | -0.600650 | 1.937802  | 1.395172  |
| 33 | 6 | 0 | -1.114980 | 1.686869  | -0.924850 |
| 34 | 6 | 0 | -1.853217 | 2.485707  | 1.627490  |
| 35 | 1 | 0 | 0.088802  | 1.849473  | 2.231072  |
| 36 | 6 | 0 | -2.389260 | 2.225702  | -0.722823 |
| 37 | 1 | 0 | -0.859865 | 1.371897  | -1.935113 |
| 38 | 6 | 0 | -2.763668 | 2.624742  | 0.565890  |
| 39 | 1 | 0 | -2.161705 | 2.811710  | 2.616673  |
| 40 | 1 | 0 | -3.074166 | 2.320046  | -1.558111 |
| 41 | 8 | 0 | 2.388929  | 2.313834  | 1.012077  |
| 42 | 1 | 0 | 2.320358  | 3.187861  | 1.414970  |
| 43 | 8 | 0 | -3.974912 | 3.160922  | 0.891651  |
| 44 | 6 | 0 | -4.957003 | 3.269511  | -0.126694 |
| 45 | 1 | 0 | -5.212412 | 2.288557  | -0.547094 |
| 46 | 1 | 0 | -5.840113 | 3.697967  | 0.350507  |
| 47 | 1 | 0 | -4.629445 | 3.932811  | -0.937714 |
| 48 | 6 | 0 | -1.559927 | -1.380032 | 0.198785  |
| 49 | 1 | 0 | -1.617880 | -1.288440 | -0.893769 |
| 50 | 1 | 0 | -2.064157 | -0.494265 | 0.600306  |
| 51 | 6 | 0 | -2.378144 | -2.634867 | 0.606250  |
| 52 | 1 | 0 | -1.882918 | -3.531195 | 0.209371  |
| 53 | 1 | 0 | -2.377365 | -2.734718 | 1.697839  |
| 54 | 6 | 0 | -3.806138 | -2.585176 | 0.110755  |
| 55 | 6 | 0 | -4.795379 | -1.903770 | 0.835930  |



|    |   |   |           |           |           |
|----|---|---|-----------|-----------|-----------|
| 56 | 6 | 0 | -4.172649 | -3.179121 | -1.105234 |
| 57 | 6 | 0 | -6.105337 | -1.818396 | 0.363218  |
| 58 | 1 | 0 | -4.532417 | -1.437777 | 1.782884  |
| 59 | 6 | 0 | -5.481766 | -3.097700 | -1.583335 |
| 60 | 1 | 0 | -3.421466 | -3.716182 | -1.680457 |
| 61 | 6 | 0 | -6.454467 | -2.416020 | -0.850058 |
| 62 | 1 | 0 | -6.855802 | -1.290143 | 0.945671  |
| 63 | 1 | 0 | -5.742993 | -3.570919 | -2.526363 |
| 64 | 1 | 0 | -7.475205 | -2.355102 | -1.217356 |
| 65 | 1 | 0 | 0.328943  | -2.361607 | 0.299783  |
| 66 | 1 | 0 | 1.106100  | -1.377444 | 2.490676  |
| 67 | 8 | 0 | 1.431241  | 3.632997  | -0.675921 |
| 68 | 6 | 0 | 1.025470  | 3.912750  | -1.996321 |
| 69 | 1 | 0 | -0.042825 | 3.701650  | -2.136433 |
| 70 | 1 | 0 | 1.194121  | 4.978124  | -2.184760 |
| 71 | 1 | 0 | 1.593868  | 3.327892  | -2.730747 |

-----  
**IM4** (SCF energy in toluene: -1252.815445 a.u.; Free energy in toluene: -1252.341014 a.u.)  
 -----

| Center<br>Number | Atomic<br>Number | Atomic<br>Type | Coordinates (Angstroms) |           |           |
|------------------|------------------|----------------|-------------------------|-----------|-----------|
|                  |                  |                | X                       | Y         | Z         |
| 1                | 28               | 0              | -0.882898               | 0.963832  | 0.764149  |
| 2                | 6                | 0              | 0.540026                | 0.102914  | 1.807295  |
| 3                | 6                | 0              | 0.145699                | -1.020099 | 2.774628  |
| 4                | 1                | 0              | 0.965637                | -1.296724 | 3.455134  |
| 5                | 1                | 0              | -0.158348               | -1.924168 | 2.237845  |
| 6                | 6                | 0              | -2.283650               | 3.176870  | -1.000218 |
| 7                | 6                | 0              | -1.455517               | 3.011690  | -2.285913 |
| 8                | 6                | 0              | -1.649510               | 4.217163  | -0.062376 |
| 9                | 6                | 0              | 0.024649                | 2.713257  | -2.008524 |
| 10               | 1                | 0              | -1.540996               | 3.944251  | -2.859389 |
| 11               | 1                | 0              | -1.897681               | 2.224239  | -2.908764 |
| 12               | 6                | 0              | -0.158619               | 3.967738  | 0.220591  |
| 13               | 1                | 0              | -1.748926               | 5.206073  | -0.525353 |
| 14               | 1                | 0              | -2.208453               | 4.261819  | 0.882380  |
| 15               | 6                | 0              | 0.634150                | 3.776190  | -1.084033 |
| 16               | 1                | 0              | 0.580728                | 2.680364  | -2.951837 |
| 17               | 1                | 0              | 0.122385                | 1.723212  | -1.547359 |
| 18               | 1                | 0              | 1.677079                | 3.529568  | -0.848026 |
| 19               | 1                | 0              | 0.657048                | 4.744015  | -1.602335 |
| 20               | 1                | 0              | 0.241063                | 4.854884  | 0.733154  |
| 21               | 1                | 0              | -3.282856               | 3.538976  | -1.283383 |
| 22               | 7                | 0              | -2.412374               | 1.875007  | -0.298215 |

|    |   |   |           |           |           |
|----|---|---|-----------|-----------|-----------|
| 23 | 1 | 0 | -3.151596 | 1.927358  | 0.403144  |
| 24 | 1 | 0 | -2.709931 | 1.144967  | -0.944695 |
| 25 | 7 | 0 | 0.006677  | 2.783589  | 1.106676  |
| 26 | 1 | 0 | 0.999012  | 2.587737  | 1.231937  |
| 27 | 1 | 0 | -0.342153 | 3.006515  | 2.039830  |
| 28 | 6 | 0 | -1.760774 | -0.688471 | 0.427869  |
| 29 | 6 | 0 | -2.845051 | -1.141148 | 1.214937  |
| 30 | 6 | 0 | -1.477740 | -1.465343 | -0.709531 |
| 31 | 6 | 0 | -3.585171 | -2.278585 | 0.896108  |
| 32 | 1 | 0 | -3.113093 | -0.602581 | 2.123502  |
| 33 | 6 | 0 | -2.204133 | -2.617906 | -1.052478 |
| 34 | 1 | 0 | -0.649904 | -1.186640 | -1.361189 |
| 35 | 6 | 0 | -3.266830 | -3.027919 | -0.244098 |
| 36 | 1 | 0 | -4.410445 | -2.611362 | 1.520080  |
| 37 | 1 | 0 | -1.927450 | -3.177171 | -1.940305 |
| 38 | 8 | 0 | -4.052012 | -4.133257 | -0.476553 |
| 39 | 6 | 0 | -3.743114 | -4.935959 | -1.598179 |
| 40 | 1 | 0 | -2.727528 | -5.351125 | -1.538295 |
| 41 | 1 | 0 | -4.464110 | -5.756228 | -1.595557 |
| 42 | 1 | 0 | -3.838599 | -4.379473 | -2.541223 |
| 43 | 6 | 0 | 1.659252  | -0.321076 | 0.839548  |
| 44 | 1 | 0 | 1.913155  | 0.507855  | 0.160458  |
| 45 | 1 | 0 | 1.293800  | -1.130374 | 0.194244  |
| 46 | 6 | 0 | 2.983165  | -0.791922 | 1.502843  |
| 47 | 1 | 0 | 3.347031  | -0.003345 | 2.175224  |
| 48 | 1 | 0 | 2.780113  | -1.667264 | 2.129479  |
| 49 | 6 | 0 | 4.054591  | -1.131877 | 0.492093  |
| 50 | 6 | 0 | 4.080488  | -2.388307 | -0.132467 |
| 51 | 6 | 0 | 5.024088  | -0.190947 | 0.116585  |
| 52 | 6 | 0 | 5.039363  | -2.693395 | -1.098754 |
| 53 | 1 | 0 | 3.340871  | -3.134908 | 0.147780  |
| 54 | 6 | 0 | 5.986843  | -0.490454 | -0.849200 |
| 55 | 1 | 0 | 5.028284  | 0.786256  | 0.595332  |
| 56 | 6 | 0 | 5.997714  | -1.744456 | -1.462132 |
| 57 | 1 | 0 | 5.041791  | -3.675070 | -1.565283 |
| 58 | 1 | 0 | 6.731884  | 0.253804  | -1.118586 |
| 59 | 1 | 0 | 6.747640  | -1.982135 | -2.211451 |
| 60 | 1 | 0 | 0.943773  | 0.921960  | 2.439405  |
| 61 | 1 | 0 | -0.701618 | -0.724433 | 3.403581  |

-----  
**IM5** (SCF energy in toluene: -1252.786212 a.u.; Free energy in toluene: -1252.314984 a.u.)  
 -----

| Center<br>Number | Atomic<br>Number | Atomic<br>Type | Coordinates (Angstroms) |   |   |
|------------------|------------------|----------------|-------------------------|---|---|
|                  |                  |                | X                       | Y | Z |

---

|    |    |   |           |           |           |
|----|----|---|-----------|-----------|-----------|
| 1  | 28 | 0 | -0.265015 | -0.186900 | 0.079624  |
| 2  | 6  | 0 | 2.818647  | 2.624555  | -0.987129 |
| 3  | 6  | 0 | 1.795218  | 1.660964  | -1.008374 |
| 4  | 6  | 0 | 1.156446  | 1.173789  | 0.148914  |
| 5  | 6  | 0 | 1.616577  | 1.748517  | 1.359051  |
| 6  | 6  | 0 | 2.631149  | 2.703679  | 1.416611  |
| 7  | 6  | 0 | 3.242108  | 3.149028  | 0.237675  |
| 8  | 1  | 0 | 3.261647  | 2.957147  | -1.920555 |
| 9  | 1  | 0 | 1.497060  | 1.281289  | -1.986686 |
| 10 | 1  | 0 | 2.963374  | 3.124560  | 2.361986  |
| 11 | 6  | 0 | -2.026249 | -1.012175 | 0.156332  |
| 12 | 6  | 0 | -2.284613 | 0.415292  | 0.476405  |
| 13 | 1  | 0 | -1.253606 | 1.033271  | 0.498416  |
| 14 | 1  | 0 | 1.168452  | 1.439790  | 2.304177  |
| 15 | 8  | 0 | 4.232506  | 4.089851  | 0.391017  |
| 16 | 6  | 0 | 4.853193  | 4.592416  | -0.775553 |
| 17 | 1  | 0 | 4.133938  | 5.087623  | -1.442309 |
| 18 | 1  | 0 | 5.589556  | 5.325091  | -0.438736 |
| 19 | 1  | 0 | 5.368051  | 3.802397  | -1.340301 |
| 20 | 6  | 0 | 3.869655  | -2.060715 | 0.105883  |
| 21 | 6  | 0 | 4.056441  | -3.535898 | -0.294267 |
| 22 | 6  | 0 | 2.723765  | -1.913960 | 1.128276  |
| 23 | 6  | 0 | 2.752894  | -4.176251 | -0.794063 |
| 24 | 1  | 0 | 4.422417  | -4.085937 | 0.582986  |
| 25 | 1  | 0 | 4.840306  | -3.617236 | -1.058937 |
| 26 | 6  | 0 | 1.402430  | -2.556311 | 0.669349  |
| 27 | 1  | 0 | 3.030305  | -2.404290 | 2.060327  |
| 28 | 1  | 0 | 2.561108  | -0.856850 | 1.357864  |
| 29 | 6  | 0 | 1.628953  | -4.020254 | 0.241950  |
| 30 | 1  | 0 | 2.913697  | -5.238739 | -1.009560 |
| 31 | 1  | 0 | 2.457659  | -3.707443 | -1.739911 |
| 32 | 1  | 0 | 0.690060  | -4.447429 | -0.135764 |
| 33 | 1  | 0 | 1.884553  | -4.594769 | 1.142673  |
| 34 | 1  | 0 | 0.694736  | -2.545277 | 1.503908  |
| 35 | 1  | 0 | 4.798008  | -1.720513 | 0.594718  |
| 36 | 7  | 0 | 3.558059  | -1.258338 | -1.093527 |
| 37 | 1  | 0 | 3.483411  | -0.270114 | -0.854249 |
| 38 | 1  | 0 | 4.303255  | -1.345170 | -1.780831 |
| 39 | 7  | 0 | 0.781048  | -1.746304 | -0.433284 |
| 40 | 1  | 0 | 1.544587  | -1.476129 | -1.068491 |
| 41 | 1  | 0 | 0.144046  | -2.347163 | -0.953439 |
| 42 | 1  | 0 | -2.398033 | -1.308003 | -0.831247 |
| 43 | 1  | 0 | -2.609942 | 0.572628  | 1.511714  |

|    |   |   |           |           |           |
|----|---|---|-----------|-----------|-----------|
| 44 | 6 | 0 | -2.315004 | -2.057238 | 1.222785  |
| 45 | 1 | 0 | -1.871747 | -3.027416 | 0.964567  |
| 46 | 1 | 0 | -1.905381 | -1.764663 | 2.197775  |
| 47 | 1 | 0 | -3.392620 | -2.230275 | 1.364966  |
| 48 | 6 | 0 | -3.140145 | 1.248382  | -0.504666 |
| 49 | 1 | 0 | -2.982832 | 2.315949  | -0.307518 |
| 50 | 1 | 0 | -2.785209 | 1.061265  | -1.523991 |
| 51 | 6 | 0 | -4.616258 | 0.925354  | -0.402182 |
| 52 | 6 | 0 | -5.231430 | 0.043231  | -1.300354 |
| 53 | 6 | 0 | -5.399624 | 1.493223  | 0.613101  |
| 54 | 6 | 0 | -6.587789 | -0.267369 | -1.186711 |
| 55 | 1 | 0 | -4.642805 | -0.398359 | -2.100581 |
| 56 | 6 | 0 | -6.755012 | 1.184986  | 0.731958  |
| 57 | 1 | 0 | -4.942910 | 2.189764  | 1.312910  |
| 58 | 6 | 0 | -7.354243 | 0.301742  | -0.168713 |
| 59 | 1 | 0 | -7.045962 | -0.950815 | -1.896453 |
| 60 | 1 | 0 | -7.344747 | 1.639143  | 1.523542  |
| 61 | 1 | 0 | -8.410449 | 0.063653  | -0.080584 |

-----  
**TS3** (SCF energy in toluene: -1252.779463 a.u.; Free energy in toluene: -1252.310737 a.u.)  
 -----

| Center<br>Number | Atomic<br>Number | Atomic<br>Type | Coordinates (Angstroms) |           |           |
|------------------|------------------|----------------|-------------------------|-----------|-----------|
|                  |                  |                | X                       | Y         | Z         |
| 1                | 28               | 0              | -0.352798               | -0.109605 | 0.252058  |
| 2                | 6                | 0              | 2.661086                | 2.635069  | -0.958334 |
| 3                | 6                | 0              | 1.581671                | 1.734936  | -0.922664 |
| 4                | 6                | 0              | 1.054057                | 1.214342  | 0.272301  |
| 5                | 6                | 0              | 1.659989                | 1.690754  | 1.457588  |
| 6                | 6                | 0              | 2.736042                | 2.577019  | 1.452303  |
| 7                | 6                | 0              | 3.247138                | 3.056311  | 0.239150  |
| 8                | 1                | 0              | 3.018675                | 3.001614  | -1.915196 |
| 9                | 1                | 0              | 1.151109                | 1.435542  | -1.877693 |
| 10               | 1                | 0              | 3.189508                | 2.922936  | 2.377240  |
| 11               | 6                | 0              | -2.058310               | -1.240302 | 0.309413  |
| 12               | 6                | 0              | -2.415489               | 0.100059  | 0.517796  |
| 13               | 1                | 0              | -0.975544               | 1.125031  | 0.650971  |
| 14               | 1                | 0              | 1.282239                | 1.358111  | 2.423255  |
| 15               | 8                | 0              | 4.305926                | 3.927719  | 0.333400  |
| 16               | 6                | 0              | 4.818783                | 4.475829  | -0.864767 |
| 17               | 1                | 0              | 4.058565                | 5.051103  | -1.410803 |
| 18               | 1                | 0              | 5.630537                | 5.145006  | -0.572230 |
| 19               | 1                | 0              | 5.218603                | 3.700254  | -1.533307 |
| 20               | 6                | 0              | 3.931256                | -1.895187 | -0.095841 |

|    |   |   |           |           |           |
|----|---|---|-----------|-----------|-----------|
| 21 | 6 | 0 | 4.117652  | -3.360023 | -0.532027 |
| 22 | 6 | 0 | 2.878739  | -1.789232 | 1.026568  |
| 23 | 6 | 0 | 2.790631  | -4.034971 | -0.908607 |
| 24 | 1 | 0 | 4.584432  | -3.907920 | 0.297498  |
| 25 | 1 | 0 | 4.824447  | -3.410720 | -1.370989 |
| 26 | 6 | 0 | 1.537723  | -2.465602 | 0.687360  |
| 27 | 1 | 0 | 3.283648  | -2.277827 | 1.921564  |
| 28 | 1 | 0 | 2.710751  | -0.739867 | 1.284545  |
| 29 | 6 | 0 | 1.770067  | -3.921423 | 0.234602  |
| 30 | 1 | 0 | 2.961135  | -5.090231 | -1.150865 |
| 31 | 1 | 0 | 2.389070  | -3.568019 | -1.815628 |
| 32 | 1 | 0 | 0.813885  | -4.379924 | -0.052848 |
| 33 | 1 | 0 | 2.132908  | -4.490484 | 1.101599  |
| 34 | 1 | 0 | 0.918988  | -2.479453 | 1.590529  |
| 35 | 1 | 0 | 4.891432  | -1.539102 | 0.314422  |
| 36 | 7 | 0 | 3.498239  | -1.085566 | -1.251519 |
| 37 | 1 | 0 | 3.428032  | -0.101913 | -0.993624 |
| 38 | 1 | 0 | 4.181679  | -1.149473 | -2.002628 |
| 39 | 7 | 0 | 0.786688  | -1.672594 | -0.342924 |
| 40 | 1 | 0 | 1.481732  | -1.351451 | -1.028653 |
| 41 | 1 | 0 | 0.161813  | -2.308599 | -0.835369 |
| 42 | 1 | 0 | -2.208646 | -1.635409 | -0.698576 |
| 43 | 1 | 0 | -2.673059 | 0.391280  | 1.536978  |
| 44 | 6 | 0 | -2.091936 | -2.268492 | 1.421169  |
| 45 | 1 | 0 | -1.374947 | -3.081715 | 1.259798  |
| 46 | 1 | 0 | -1.863050 | -1.814533 | 2.391472  |
| 47 | 1 | 0 | -3.084588 | -2.733445 | 1.503987  |
| 48 | 6 | 0 | -3.119117 | 0.934128  | -0.552563 |
| 49 | 1 | 0 | -2.847886 | 1.989149  | -0.438238 |
| 50 | 1 | 0 | -2.766350 | 0.622824  | -1.541725 |
| 51 | 6 | 0 | -4.627963 | 0.783805  | -0.468443 |
| 52 | 6 | 0 | -5.306111 | -0.173112 | -1.235376 |
| 53 | 6 | 0 | -5.374678 | 1.586694  | 0.405155  |
| 54 | 6 | 0 | -6.689502 | -0.326110 | -1.132355 |
| 55 | 1 | 0 | -4.744619 | -0.800231 | -1.923799 |
| 56 | 6 | 0 | -6.757747 | 1.435897  | 0.513812  |
| 57 | 1 | 0 | -4.866732 | 2.341830  | 1.000918  |
| 58 | 6 | 0 | -7.420418 | 0.477612  | -0.255395 |
| 59 | 1 | 0 | -7.196932 | -1.070461 | -1.740056 |
| 60 | 1 | 0 | -7.318217 | 2.070918  | 1.194488  |
| 61 | 1 | 0 | -8.497552 | 0.361483  | -0.175814 |

---

IM6 (SCF energy in toluene: -1252.78052 a.u.; Free energy in toluene: -1252.312661 a.u.)

---

| Center<br>Number | Atomic<br>Number | Atomic<br>Type | Coordinates (Angstroms) |           |           |
|------------------|------------------|----------------|-------------------------|-----------|-----------|
|                  |                  |                | X                       | Y         | Z         |
| 1                | 28               | 0              | -0.381709               | -0.047451 | 0.439136  |
| 2                | 6                | 0              | 2.597921                | 2.634791  | -0.911190 |
| 3                | 6                | 0              | 1.481020                | 1.786872  | -0.812465 |
| 4                | 6                | 0              | 1.048676                | 1.230909  | 0.403746  |
| 5                | 6                | 0              | 1.782657                | 1.620067  | 1.546991  |
| 6                | 6                | 0              | 2.898289                | 2.452482  | 1.475801  |
| 7                | 6                | 0              | 3.317368                | 2.966005  | 0.241197  |
| 8                | 1                | 0              | 2.880440                | 3.032548  | -1.880523 |
| 9                | 1                | 0              | 0.945207                | 1.556574  | -1.732196 |
| 10               | 1                | 0              | 3.453864                | 2.730882  | 2.367133  |
| 11               | 6                | 0              | -2.054378               | -1.308397 | 0.544943  |
| 12               | 6                | 0              | -2.484423               | 0.007402  | 0.604313  |
| 13               | 1                | 0              | -0.849473               | 1.223768  | 0.905877  |
| 14               | 1                | 0              | 1.477387                | 1.259520  | 2.527629  |
| 15               | 8                | 0              | 4.424804                | 3.779203  | 0.270990  |
| 16               | 6                | 0              | 4.851937                | 4.358267  | -0.946213 |
| 17               | 1                | 0              | 4.075716                | 4.995372  | -1.391723 |
| 18               | 1                | 0              | 5.721984                | 4.972045  | -0.704341 |
| 19               | 1                | 0              | 5.145630                | 3.596706  | -1.682526 |
| 20               | 6                | 0              | 3.900049                | -1.863356 | -0.284684 |
| 21               | 6                | 0              | 4.041404                | -3.311573 | -0.787165 |
| 22               | 6                | 0              | 2.937188                | -1.794847 | 0.917626  |
| 23               | 6                | 0              | 2.683760                | -3.965395 | -1.084843 |
| 24               | 1                | 0              | 4.565326                | -3.891822 | -0.015803 |
| 25               | 1                | 0              | 4.681749                | -3.335167 | -1.678961 |
| 26               | 6                | 0              | 1.567467                | -2.450344 | 0.658970  |
| 27               | 1                | 0              | 3.405128                | -2.321262 | 1.759014  |
| 28               | 1                | 0              | 2.801255                | -0.755754 | 1.229572  |
| 29               | 6                | 0              | 1.755169                | -3.889542 | 0.137073  |
| 30               | 1                | 0              | 2.826656                | -5.011783 | -1.378181 |
| 31               | 1                | 0              | 2.217842                | -3.462689 | -1.940440 |
| 32               | 1                | 0              | 0.776827                | -4.334124 | -0.091814 |
| 33               | 1                | 0              | 2.180381                | -4.491762 | 0.951827  |
| 34               | 1                | 0              | 1.025274                | -2.495960 | 1.609285  |
| 35               | 1                | 0              | 4.891449                | -1.528476 | 0.065013  |
| 36               | 7                | 0              | 3.388227                | -1.007961 | -1.373011 |
| 37               | 1                | 0              | 3.351746                | -0.033723 | -1.075592 |
| 38               | 1                | 0              | 4.010053                | -1.050962 | -2.177291 |
| 39               | 7                | 0              | 0.740735                | -1.617694 | -0.277748 |

---

|    |   |   |           |           |           |
|----|---|---|-----------|-----------|-----------|
| 40 | 1 | 0 | 1.384143  | -1.259719 | -0.994430 |
| 41 | 1 | 0 | 0.093772  | -2.239656 | -0.759087 |
| 42 | 1 | 0 | -2.101845 | -1.806811 | -0.425907 |
| 43 | 1 | 0 | -2.769124 | 0.407179  | 1.576253  |
| 44 | 6 | 0 | -2.026597 | -2.220981 | 1.751182  |
| 45 | 1 | 0 | -1.223240 | -2.963681 | 1.696195  |
| 46 | 1 | 0 | -1.892280 | -1.651632 | 2.676512  |
| 47 | 1 | 0 | -2.969416 | -2.778513 | 1.841096  |
| 48 | 6 | 0 | -3.093101 | 0.745951  | -0.580431 |
| 49 | 1 | 0 | -2.756213 | 1.787234  | -0.580196 |
| 50 | 1 | 0 | -2.733101 | 0.295401  | -1.512532 |
| 51 | 6 | 0 | -4.612486 | 0.705911  | -0.539535 |
| 52 | 6 | 0 | -5.321362 | -0.385996 | -1.059350 |
| 53 | 6 | 0 | -5.337409 | 1.752151  | 0.046273  |
| 54 | 6 | 0 | -6.714273 | -0.431887 | -0.996635 |
| 55 | 1 | 0 | -4.775251 | -1.205137 | -1.521246 |
| 56 | 6 | 0 | -6.731212 | 1.710023  | 0.113465  |
| 57 | 1 | 0 | -4.803520 | 2.610539  | 0.447521  |
| 58 | 6 | 0 | -7.424607 | 0.616939  | -0.408352 |
| 59 | 1 | 0 | -7.245868 | -1.284534 | -1.410494 |
| 60 | 1 | 0 | -7.274769 | 2.533486  | 0.568615  |
| 61 | 1 | 0 | -8.509376 | 0.583802  | -0.360969 |

-----  
**IM7** (SCF energy in toluene: -1252.785766 a.u.; Free energy in toluene: -1252.317111 a.u.)  
 -----

| Center<br>Number | Atomic<br>Number | Atomic<br>Type | Coordinates (Angstroms) |           |           |
|------------------|------------------|----------------|-------------------------|-----------|-----------|
|                  |                  |                | X                       | Y         | Z         |
| 1                | 28               | 0              | -0.085839               | -0.979793 | 0.452836  |
| 2                | 6                | 0              | 4.069074                | -1.668730 | 0.589136  |
| 3                | 6                | 0              | 2.708776                | -1.531654 | 0.905396  |
| 4                | 6                | 0              | 1.715773                | -1.319207 | -0.065959 |
| 5                | 6                | 0              | 2.165547                | -1.287200 | -1.404016 |
| 6                | 6                | 0              | 3.514117                | -1.407511 | -1.744501 |
| 7                | 6                | 0              | 4.478372                | -1.599146 | -0.745649 |
| 8                | 1                | 0              | 4.787014                | -1.829246 | 1.386534  |
| 9                | 1                | 0              | 2.432442                | -1.591722 | 1.957087  |
| 10               | 1                | 0              | 3.840983                | -1.373704 | -2.780317 |
| 11               | 6                | 0              | -2.216537               | -0.658334 | 0.627314  |
| 12               | 6                | 0              | -1.825379               | -1.547775 | 1.595896  |
| 13               | 1                | 0              | -0.142886               | -2.342920 | -0.005582 |
| 14               | 1                | 0              | 1.446177                | -1.166466 | -2.211892 |
| 15               | 8                | 0              | 5.779010                | -1.709537 | -1.177260 |
| 16               | 6                | 0              | 6.777801                | -1.954925 | -0.206575 |

|    |   |   |           |           |           |
|----|---|---|-----------|-----------|-----------|
| 17 | 1 | 0 | 6.602257  | -2.895510 | 0.333070  |
| 18 | 1 | 0 | 7.721747  | -2.026727 | -0.750779 |
| 19 | 1 | 0 | 6.848910  | -1.138424 | 0.525856  |
| 20 | 6 | 0 | 2.097819  | 2.851134  | -0.856153 |
| 21 | 6 | 0 | 1.965493  | 4.202352  | -0.130739 |
| 22 | 6 | 0 | 0.704885  | 2.243239  | -1.121881 |
| 23 | 6 | 0 | 1.142600  | 4.088353  | 1.160773  |
| 24 | 1 | 0 | 1.485169  | 4.917168  | -0.812467 |
| 25 | 1 | 0 | 2.963622  | 4.605223  | 0.086045  |
| 26 | 6 | 0 | -0.178595 | 2.133811  | 0.135244  |
| 27 | 1 | 0 | 0.185680  | 2.881915  | -1.847158 |
| 28 | 1 | 0 | 0.811845  | 1.256336  | -1.583456 |
| 29 | 6 | 0 | -0.241709 | 3.485257  | 0.877676  |
| 30 | 1 | 0 | 1.028639  | 5.075134  | 1.624096  |
| 31 | 1 | 0 | 1.683250  | 3.463481  | 1.880496  |
| 32 | 1 | 0 | -0.813225 | 3.370425  | 1.808872  |
| 33 | 1 | 0 | -0.816298 | 4.183400  | 0.252988  |
| 34 | 1 | 0 | -1.194955 | 1.880199  | -0.185839 |
| 35 | 1 | 0 | 2.571871  | 3.035477  | -1.835778 |
| 36 | 7 | 0 | 2.885576  | 1.925054  | -0.025070 |
| 37 | 1 | 0 | 3.038197  | 1.045420  | -0.516248 |
| 38 | 1 | 0 | 3.803200  | 2.318350  | 0.170042  |
| 39 | 7 | 0 | 0.291991  | 1.010578  | 1.003245  |
| 40 | 1 | 0 | 1.312439  | 1.099719  | 1.077694  |
| 41 | 1 | 0 | -0.086783 | 1.144004  | 1.940508  |
| 42 | 1 | 0 | -2.348144 | 0.385670  | 0.910095  |
| 43 | 1 | 0 | -1.912770 | -2.611680 | 1.391290  |
| 44 | 6 | 0 | -2.827113 | -1.048664 | -0.704699 |
| 45 | 1 | 0 | -2.332542 | -0.501627 | -1.517027 |
| 46 | 1 | 0 | -2.636648 | -2.111771 | -0.885798 |
| 47 | 6 | 0 | -1.590112 | -1.191895 | 3.042337  |
| 48 | 1 | 0 | -0.669095 | -1.644031 | 3.425731  |
| 49 | 1 | 0 | -1.536533 | -0.109455 | 3.197737  |
| 50 | 1 | 0 | -2.415349 | -1.569696 | 3.661006  |
| 51 | 6 | 0 | -4.321143 | -0.764098 | -0.757177 |
| 52 | 6 | 0 | -5.225719 | -1.569662 | -0.050285 |
| 53 | 6 | 0 | -4.826036 | 0.311896  | -1.497115 |
| 54 | 6 | 0 | -6.594945 | -1.308731 | -0.084702 |
| 55 | 1 | 0 | -4.850948 | -2.410782 | 0.528070  |
| 56 | 6 | 0 | -6.196673 | 0.579194  | -1.532615 |
| 57 | 1 | 0 | -4.139831 | 0.941663  | -2.059082 |
| 58 | 6 | 0 | -7.085903 | -0.230908 | -0.826223 |
| 59 | 1 | 0 | -7.280464 | -1.948611 | 0.464279  |
| 60 | 1 | 0 | -6.568277 | 1.416971  | -2.116395 |



61            1            0            -8.152622    -0.027857    -0.855143

-----  
**TS4** (SCF energy in toluene: -1252.779594 a.u.; Free energy in toluene: -1252.311221 a.u.)  
-----

| Center<br>Number | Atomic<br>Number | Atomic<br>Type | Coordinates (Angstroms) |           |           |
|------------------|------------------|----------------|-------------------------|-----------|-----------|
|                  |                  |                | X                       | Y         | Z         |
| 1                | 28               | 0              | 0.120812                | -0.867378 | -0.182167 |
| 2                | 6                | 0              | -4.033905               | -1.470173 | -0.836881 |
| 3                | 6                | 0              | -2.647748               | -1.294067 | -0.991797 |
| 4                | 6                | 0              | -1.754502               | -1.238590 | 0.092595  |
| 5                | 6                | 0              | -2.339399               | -1.415464 | 1.367354  |
| 6                | 6                | 0              | -3.710909               | -1.584860 | 1.551250  |
| 7                | 6                | 0              | -4.571450               | -1.612397 | 0.446008  |
| 8                | 1                | 0              | -4.668493               | -1.505572 | -1.716506 |
| 9                | 1                | 0              | -2.268960               | -1.191476 | -2.008123 |
| 10               | 1                | 0              | -4.138029               | -1.711829 | 2.542324  |
| 11               | 6                | 0              | 2.147856                | -0.829321 | -0.457534 |
| 12               | 6                | 0              | 1.748913                | -2.171260 | -0.360615 |
| 13               | 1                | 0              | 0.029618                | -2.277648 | 0.094333  |
| 14               | 1                | 0              | -1.705183               | -1.418929 | 2.252546  |
| 15               | 8                | 0              | -5.905799               | -1.787371 | 0.725253  |
| 16               | 6                | 0              | -6.802022               | -1.881532 | -0.364293 |
| 17               | 1                | 0              | -6.558126               | -2.725723 | -1.023669 |
| 18               | 1                | 0              | -7.792441               | -2.040312 | 0.067172  |
| 19               | 1                | 0              | -6.818046               | -0.960898 | -0.964785 |
| 20               | 6                | 0              | -2.524021               | 2.934095  | 0.283474  |
| 21               | 6                | 0              | -1.967148               | 4.311460  | -0.119419 |
| 22               | 6                | 0              | -1.522871               | 2.185968  | 1.187353  |
| 23               | 6                | 0              | -0.568182               | 4.220677  | -0.746977 |
| 24               | 1                | 0              | -1.923930               | 4.939310  | 0.780634  |
| 25               | 1                | 0              | -2.663820               | 4.807613  | -0.808111 |
| 26               | 6                | 0              | -0.105692               | 2.082112  | 0.593624  |
| 27               | 1                | 0              | -1.448691               | 2.729631  | 2.137442  |
| 28               | 1                | 0              | -1.902678               | 1.187272  | 1.419847  |
| 29               | 6                | 0              | 0.406340                | 3.476446  | 0.179444  |
| 30               | 1                | 0              | -0.185126               | 5.225862  | -0.957244 |
| 31               | 1                | 0              | -0.634513               | 3.704968  | -1.711987 |
| 32               | 1                | 0              | 1.395143                | 3.386112  | -0.291089 |
| 33               | 1                | 0              | 0.556881                | 4.065442  | 1.094671  |
| 34               | 1                | 0              | 0.562324                | 1.684452  | 1.364746  |
| 35               | 1                | 0              | -3.442960               | 3.099007  | 0.871146  |
| 36               | 7                | 0              | -2.786680               | 2.130675  | -0.926359 |
| 37               | 1                | 0              | -3.214413               | 1.239035  | -0.679009 |

|    |   |   |           |           |           |
|----|---|---|-----------|-----------|-----------|
| 38 | 1 | 0 | -3.440379 | 2.615807  | -1.536854 |
| 39 | 7 | 0 | -0.077874 | 1.111868  | -0.552150 |
| 40 | 1 | 0 | -0.938947 | 1.272883  | -1.090019 |
| 41 | 1 | 0 | 0.698507  | 1.364960  | -1.161143 |
| 42 | 1 | 0 | 2.329984  | -0.442324 | -1.463518 |
| 43 | 1 | 0 | 1.967882  | -2.686061 | 0.575424  |
| 44 | 6 | 0 | 2.931469  | -0.129640 | 0.646493  |
| 45 | 1 | 0 | 2.658850  | 0.932057  | 0.694692  |
| 46 | 1 | 0 | 2.655436  | -0.565653 | 1.614507  |
| 47 | 6 | 0 | 1.677491  | -3.084099 | -1.569351 |
| 48 | 1 | 0 | 0.971621  | -3.906151 | -1.420852 |
| 49 | 1 | 0 | 1.372775  | -2.535157 | -2.465037 |
| 50 | 1 | 0 | 2.668596  | -3.515515 | -1.760537 |
| 51 | 6 | 0 | 4.437318  | -0.229148 | 0.454733  |
| 52 | 6 | 0 | 5.142014  | -1.370056 | 0.864741  |
| 53 | 6 | 0 | 5.152400  | 0.804687  | -0.163331 |
| 54 | 6 | 0 | 6.517726  | -1.475860 | 0.660587  |
| 55 | 1 | 0 | 4.606542  | -2.181015 | 1.352813  |
| 56 | 6 | 0 | 6.529366  | 0.703401  | -0.372493 |
| 57 | 1 | 0 | 4.625230  | 1.702445  | -0.479610 |
| 58 | 6 | 0 | 7.217304  | -0.438732 | 0.038956  |
| 59 | 1 | 0 | 7.045399  | -2.366492 | 0.991079  |
| 60 | 1 | 0 | 7.064350  | 1.518854  | -0.851835 |
| 61 | 1 | 0 | 8.289043  | -0.519109 | -0.118753 |

-----  
**IM8** (SCF energy in toluene: -1252.787279 a.u.; Free energy in toluene: -1252.316076 a.u.)  
 -----

| Center<br>Number | Atomic<br>Number | Atomic<br>Type | Coordinates (Angstroms) |           |           |
|------------------|------------------|----------------|-------------------------|-----------|-----------|
|                  |                  |                | X                       | Y         | Z         |
| 1                | 28               | 0              | 0.168063                | -0.476690 | -0.345098 |
| 2                | 6                | 0              | -3.917888               | -1.719234 | -0.859919 |
| 3                | 6                | 0              | -2.606051               | -1.255030 | -1.057491 |
| 4                | 6                | 0              | -1.652999               | -1.146631 | -0.026179 |
| 5                | 6                | 0              | -2.113605               | -1.563505 | 1.246505  |
| 6                | 6                | 0              | -3.408705               | -2.026541 | 1.478059  |
| 7                | 6                | 0              | -4.323695               | -2.106603 | 0.420673  |
| 8                | 1                | 0              | -4.597470               | -1.780930 | -1.703921 |
| 9                | 1                | 0              | -2.334259               | -0.964554 | -2.073159 |
| 10               | 1                | 0              | -3.733038               | -2.338027 | 2.467471  |
| 11               | 6                | 0              | 2.098683                | -0.452344 | -0.588215 |
| 12               | 6                | 0              | 1.791755                | -1.885118 | -0.324940 |
| 13               | 1                | 0              | 0.620597                | -2.023984 | -0.106665 |
| 14               | 1                | 0              | -1.436929               | -1.526323 | 2.100926  |

|    |   |   |           |           |           |
|----|---|---|-----------|-----------|-----------|
| 15 | 8 | 0 | -5.576402 | -2.572452 | 0.741315  |
| 16 | 6 | 0 | -6.518369 | -2.708450 | -0.304425 |
| 17 | 1 | 0 | -6.172604 | -3.406309 | -1.079275 |
| 18 | 1 | 0 | -7.427569 | -3.104588 | 0.152535  |
| 19 | 1 | 0 | -6.748102 | -1.743906 | -0.778794 |
| 20 | 6 | 0 | -2.749145 | 2.879326  | 0.524441  |
| 21 | 6 | 0 | -2.407905 | 4.331789  | 0.144700  |
| 22 | 6 | 0 | -1.572194 | 2.223051  | 1.275642  |
| 23 | 6 | 0 | -1.093131 | 4.437786  | -0.642222 |
| 24 | 1 | 0 | -2.331028 | 4.919662  | 1.069172  |
| 25 | 1 | 0 | -3.234163 | 4.769348  | -0.431105 |
| 26 | 6 | 0 | -0.232066 | 2.317090  | 0.523746  |
| 27 | 1 | 0 | -1.453260 | 2.732950  | 2.239636  |
| 28 | 1 | 0 | -1.803928 | 1.175917  | 1.492067  |
| 29 | 6 | 0 | 0.064259  | 3.775622  | 0.121590  |
| 30 | 1 | 0 | -0.854377 | 5.489754  | -0.835917 |
| 31 | 1 | 0 | -1.216557 | 3.961433  | -1.621676 |
| 32 | 1 | 0 | 0.991945  | 3.819631  | -0.465096 |
| 33 | 1 | 0 | 0.260169  | 4.340877  | 1.043029  |
| 34 | 1 | 0 | 0.568642  | 1.972987  | 1.185633  |
| 35 | 1 | 0 | -3.612249 | 2.900462  | 1.210866  |
| 36 | 7 | 0 | -3.040700 | 2.105182  | -0.697786 |
| 37 | 1 | 0 | -3.321114 | 1.153362  | -0.464443 |
| 38 | 1 | 0 | -3.811779 | 2.528215  | -1.209222 |
| 39 | 7 | 0 | -0.233148 | 1.398887  | -0.666029 |
| 40 | 1 | 0 | -1.152761 | 1.501629  | -1.116944 |
| 41 | 1 | 0 | 0.472704  | 1.723526  | -1.324903 |
| 42 | 1 | 0 | 2.406260  | -0.263098 | -1.623453 |
| 43 | 1 | 0 | 2.190957  | -2.241018 | 0.631933  |
| 44 | 6 | 0 | 2.979271  | 0.298683  | 0.414607  |
| 45 | 1 | 0 | 2.905745  | 1.377316  | 0.217885  |
| 46 | 1 | 0 | 2.596521  | 0.145258  | 1.432120  |
| 47 | 6 | 0 | 2.054336  | -2.893549 | -1.448305 |
| 48 | 1 | 0 | 1.605652  | -3.869490 | -1.235476 |
| 49 | 1 | 0 | 1.644810  | -2.533258 | -2.396956 |
| 50 | 1 | 0 | 3.132971  | -3.029727 | -1.574217 |
| 51 | 6 | 0 | 4.445217  | -0.103733 | 0.375639  |
| 52 | 6 | 0 | 4.981690  | -0.986993 | 1.322405  |
| 53 | 6 | 0 | 5.292924  | 0.376257  | -0.634194 |
| 54 | 6 | 0 | 6.318799  | -1.386216 | 1.259981  |
| 55 | 1 | 0 | 4.347369  | -1.359053 | 2.123968  |
| 56 | 6 | 0 | 6.629111  | -0.017407 | -0.700570 |
| 57 | 1 | 0 | 4.899449  | 1.069353  | -1.374855 |
| 58 | 6 | 0 | 7.147984  | -0.903345 | 0.247072  |

|    |   |   |          |           |           |
|----|---|---|----------|-----------|-----------|
| 59 | 1 | 0 | 6.712991 | -2.069817 | 2.007253  |
| 60 | 1 | 0 | 7.268005 | 0.370783  | -1.489448 |
| 61 | 1 | 0 | 8.189132 | -1.209362 | 0.198351  |

-----  
**IM9** (SCF energy in toluene: -1252.789657 a.u.; Free energy in toluene: -1252.319684 a.u.)  
 -----

| Center<br>Number | Atomic<br>Number | Atomic<br>Type | Coordinates (Angstroms) |           |           |
|------------------|------------------|----------------|-------------------------|-----------|-----------|
|                  |                  |                | X                       | Y         | Z         |
| 1                | 28               | 0              | 0.513166                | 0.159850  | -0.670291 |
| 2                | 6                | 0              | -2.922035               | -2.301527 | -1.373229 |
| 3                | 6                | 0              | -1.814636               | -1.448817 | -1.498469 |
| 4                | 6                | 0              | -0.966474               | -1.108701 | -0.426635 |
| 5                | 6                | 0              | -1.308414               | -1.708477 | 0.808946  |
| 6                | 6                | 0              | -2.407403               | -2.554982 | 0.970010  |
| 7                | 6                | 0              | -3.223970               | -2.858007 | -0.126899 |
| 8                | 1                | 0              | -3.531205               | -2.519240 | -2.244493 |
| 9                | 1                | 0              | -1.621827               | -1.034511 | -2.488743 |
| 10               | 1                | 0              | -2.645631               | -3.001081 | 1.932066  |
| 11               | 6                | 0              | 2.279650                | 0.897745  | -0.999487 |
| 12               | 6                | 0              | 2.504595                | -0.580096 | -0.929119 |
| 13               | 1                | 0              | 1.457040                | -1.156687 | -0.771180 |
| 14               | 1                | 0              | -0.697054               | -1.514350 | 1.690919  |
| 15               | 8                | 0              | -4.282086               | -3.698757 | 0.124195  |
| 16               | 6                | 0              | -5.107486               | -4.064454 | -0.964478 |
| 17               | 1                | 0              | -4.542057               | -4.582912 | -1.750787 |
| 18               | 1                | 0              | -5.862298               | -4.742821 | -0.561351 |
| 19               | 1                | 0              | -5.610060               | -3.194475 | -1.409951 |
| 20               | 6                | 0              | -2.672163               | 2.200441  | 1.641782  |
| 21               | 6                | 0              | -3.090841               | 3.659464  | 1.383203  |
| 22               | 6                | 0              | -1.136578               | 2.092364  | 1.750140  |
| 23               | 6                | 0              | -2.394535               | 4.252931  | 0.149498  |
| 24               | 1                | 0              | -2.839854               | 4.255098  | 2.271208  |
| 25               | 1                | 0              | -4.181450               | 3.717140  | 1.270940  |
| 26               | 6                | 0              | -0.387297               | 2.693159  | 0.546515  |
| 27               | 1                | 0              | -0.816793               | 2.628261  | 2.652167  |
| 28               | 1                | 0              | -0.845230               | 1.044537  | 1.879340  |
| 29               | 6                | 0              | -0.867500               | 4.131507  | 0.265607  |
| 30               | 1                | 0              | -2.673006               | 5.306257  | 0.030327  |
| 31               | 1                | 0              | -2.745159               | 3.733502  | -0.749499 |
| 32               | 1                | 0              | -0.376869               | 4.517059  | -0.638196 |
| 33               | 1                | 0              | -0.518048               | 4.763011  | 1.094012  |
| 34               | 1                | 0              | 0.682205                | 2.724348  | 0.775060  |
| 35               | 1                | 0              | -3.097065               | 1.889611  | 2.611661  |

|    |   |   |           |           |           |
|----|---|---|-----------|-----------|-----------|
| 36 | 7 | 0 | -3.144176 | 1.352088  | 0.533228  |
| 37 | 1 | 0 | -2.912159 | 0.374183  | 0.703437  |
| 38 | 1 | 0 | -4.155978 | 1.409969  | 0.446948  |
| 39 | 7 | 0 | -0.535941 | 1.797990  | -0.646642 |
| 40 | 1 | 0 | -1.533921 | 1.561730  | -0.725815 |
| 41 | 1 | 0 | -0.263238 | 2.316888  | -1.481362 |
| 42 | 1 | 0 | 2.793648  | -1.010525 | -1.894349 |
| 43 | 6 | 0 | 3.369617  | -1.114500 | 0.189947  |
| 44 | 6 | 0 | 4.640196  | -1.633943 | -0.089600 |
| 45 | 6 | 0 | 2.939337  | -1.074501 | 1.523121  |
| 46 | 6 | 0 | 5.467134  | -2.088262 | 0.938561  |
| 47 | 1 | 0 | 4.984936  | -1.680656 | -1.119854 |
| 48 | 6 | 0 | 3.764644  | -1.527761 | 2.552719  |
| 49 | 1 | 0 | 1.946467  | -0.692459 | 1.748434  |
| 50 | 6 | 0 | 5.032982  | -2.035211 | 2.264334  |
| 51 | 1 | 0 | 6.449619  | -2.487647 | 0.702289  |
| 52 | 1 | 0 | 3.412874  | -1.492440 | 3.580186  |
| 53 | 1 | 0 | 5.674488  | -2.392411 | 3.064760  |
| 54 | 1 | 0 | 2.703090  | 1.438005  | -0.146084 |
| 55 | 6 | 0 | 2.542502  | 1.602341  | -2.323404 |
| 56 | 1 | 0 | 2.035722  | 2.579620  | -2.323211 |
| 57 | 1 | 0 | 2.089431  | 1.029877  | -3.145538 |
| 58 | 6 | 0 | 4.031881  | 1.835430  | -2.636144 |
| 59 | 1 | 0 | 4.575223  | 0.885714  | -2.694833 |
| 60 | 1 | 0 | 4.167760  | 2.358416  | -3.589979 |
| 61 | 1 | 0 | 4.506011  | 2.435810  | -1.851570 |

-----  
**TS5** (SCF energy in toluene: -1252.784747 a.u.; Free energy in toluene: -1252.316963 a.u.)  
 -----

| Center<br>Number | Atomic<br>Number | Atomic<br>Type | Coordinates (Angstroms) |           |           |
|------------------|------------------|----------------|-------------------------|-----------|-----------|
|                  |                  |                | X                       | Y         | Z         |
| 1                | 28               | 0              | 0.620185                | 0.030119  | -0.755889 |
| 2                | 6                | 0              | -3.009423               | -2.077725 | -1.411865 |
| 3                | 6                | 0              | -1.821741               | -1.347664 | -1.570467 |
| 4                | 6                | 0              | -0.901754               | -1.139260 | -0.527664 |
| 5                | 6                | 0              | -1.232896               | -1.750357 | 0.702822  |
| 6                | 6                | 0              | -2.411609               | -2.474804 | 0.891863  |
| 7                | 6                | 0              | -3.311459               | -2.641922 | -0.169078 |
| 8                | 1                | 0              | -3.678744               | -2.197546 | -2.257409 |
| 9                | 1                | 0              | -1.624493               | -0.925213 | -2.555280 |
| 10               | 1                | 0              | -2.647764               | -2.933322 | 1.848464  |
| 11               | 6                | 0              | 2.398932                | 0.908333  | -1.101804 |
| 12               | 6                | 0              | 2.627113                | -0.488640 | -0.977695 |

|    |   |   |           |           |           |
|----|---|---|-----------|-----------|-----------|
| 13 | 1 | 0 | 1.176176  | -1.303716 | -0.891959 |
| 14 | 1 | 0 | -0.551066 | -1.663291 | 1.547530  |
| 15 | 8 | 0 | -4.443506 | -3.369884 | 0.111155  |
| 16 | 6 | 0 | -5.354755 | -3.606399 | -0.944104 |
| 17 | 1 | 0 | -4.888895 | -4.158522 | -1.771741 |
| 18 | 1 | 0 | -6.161071 | -4.209853 | -0.522058 |
| 19 | 1 | 0 | -5.777431 | -2.672196 | -1.339967 |
| 20 | 6 | 0 | -2.481854 | 2.142249  | 1.747813  |
| 21 | 6 | 0 | -2.872076 | 3.615969  | 1.531964  |
| 22 | 6 | 0 | -0.946386 | 1.994322  | 1.799439  |
| 23 | 6 | 0 | -2.202841 | 4.216970  | 0.287093  |
| 24 | 1 | 0 | -2.575858 | 4.187298  | 2.422018  |
| 25 | 1 | 0 | -3.964140 | 3.702632  | 1.458675  |
| 26 | 6 | 0 | -0.221476 | 2.604916  | 0.584936  |
| 27 | 1 | 0 | -0.584231 | 2.501432  | 2.702277  |
| 28 | 1 | 0 | -0.676767 | 0.937136  | 1.896199  |
| 29 | 6 | 0 | -0.676173 | 4.060588  | 0.353381  |
| 30 | 1 | 0 | -2.462428 | 5.277844  | 0.194849  |
| 31 | 1 | 0 | -2.591390 | 3.720114  | -0.608948 |
| 32 | 1 | 0 | -0.205272 | 4.455857  | -0.556763 |
| 33 | 1 | 0 | -0.288347 | 4.666086  | 1.184396  |
| 34 | 1 | 0 | 0.854425  | 2.612889  | 0.788569  |
| 35 | 1 | 0 | -2.879035 | 1.824181  | 2.727308  |
| 36 | 7 | 0 | -3.015498 | 1.327771  | 0.642631  |
| 37 | 1 | 0 | -2.814670 | 0.339862  | 0.793027  |
| 38 | 1 | 0 | -4.026878 | 1.421223  | 0.588790  |
| 39 | 7 | 0 | -0.418922 | 1.738466  | -0.619305 |
| 40 | 1 | 0 | -1.420349 | 1.512799  | -0.665970 |
| 41 | 1 | 0 | -0.184702 | 2.277823  | -1.452686 |
| 42 | 1 | 0 | 2.838263  | -1.024836 | -1.904033 |
| 43 | 6 | 0 | 3.293293  | -1.108776 | 0.210026  |
| 44 | 6 | 0 | 4.148638  | -2.203682 | 0.021109  |
| 45 | 6 | 0 | 3.111467  | -0.625515 | 1.516038  |
| 46 | 6 | 0 | 4.814205  | -2.791218 | 1.097953  |
| 47 | 1 | 0 | 4.295364  | -2.597360 | -0.981830 |
| 48 | 6 | 0 | 3.775301  | -1.210459 | 2.592570  |
| 49 | 1 | 0 | 2.435942  | 0.207272  | 1.689789  |
| 50 | 6 | 0 | 4.631638  | -2.295881 | 2.389052  |
| 51 | 1 | 0 | 5.473660  | -3.637367 | 0.925979  |
| 52 | 1 | 0 | 3.618917  | -0.822255 | 3.595393  |
| 53 | 1 | 0 | 5.145430  | -2.753053 | 3.229713  |
| 54 | 1 | 0 | 2.684360  | 1.530691  | -0.251565 |
| 55 | 6 | 0 | 2.505328  | 1.596435  | -2.451415 |
| 56 | 1 | 0 | 1.855113  | 2.483906  | -2.478952 |

|    |   |   |          |          |           |
|----|---|---|----------|----------|-----------|
| 57 | 1 | 0 | 2.134305 | 0.925246 | -3.237181 |
| 58 | 6 | 0 | 3.938020 | 2.040412 | -2.797864 |
| 59 | 1 | 0 | 4.613422 | 1.179468 | -2.841999 |
| 60 | 1 | 0 | 3.975236 | 2.551230 | -3.766772 |
| 61 | 1 | 0 | 4.329787 | 2.728283 | -2.040109 |

-----  
**IM10** (SCF energy in toluene: -1252.79115 a.u.; Free energy in toluene: -1252.323551 a.u.)  
 -----

| Center<br>Number | Atomic<br>Number | Atomic<br>Type | Coordinates (Angstroms) |           |           |
|------------------|------------------|----------------|-------------------------|-----------|-----------|
|                  |                  |                | X                       | Y         | Z         |
| 1                | 28               | 0              | 0.416330                | -1.126845 | -0.551405 |
| 2                | 6                | 0              | -3.797722               | -1.368457 | -0.635774 |
| 3                | 6                | 0              | -2.436647               | -1.416471 | -0.972086 |
| 4                | 6                | 0              | -1.412220               | -1.234350 | -0.028340 |
| 5                | 6                | 0              | -1.831988               | -1.038090 | 1.305660  |
| 6                | 6                | 0              | -3.180129               | -0.979830 | 1.664208  |
| 7                | 6                | 0              | -4.175185               | -1.142579 | 0.690832  |
| 8                | 1                | 0              | -4.542144               | -1.511592 | -1.411862 |
| 9                | 1                | 0              | -2.184312               | -1.602789 | -2.014755 |
| 10               | 1                | 0              | -3.484789               | -0.824310 | 2.695753  |
| 11               | 6                | 0              | 2.365833                | -1.242999 | -1.458253 |
| 12               | 6                | 0              | 2.447577                | -1.740742 | -0.176503 |
| 13               | 1                | 0              | 0.203918                | -2.481116 | -0.117008 |
| 14               | 1                | 0              | -1.088326               | -0.926100 | 2.092467  |
| 15               | 8                | 0              | -5.473082               | -1.068879 | 1.138542  |
| 16               | 6                | 0              | -6.508322               | -1.269624 | 0.196170  |
| 17               | 1                | 0              | -6.452300               | -2.263503 | -0.268543 |
| 18               | 1                | 0              | -7.445872               | -1.187139 | 0.749872  |
| 19               | 1                | 0              | -6.494165               | -0.510002 | -0.598027 |
| 20               | 6                | 0              | -1.081709               | 3.063658  | 0.543420  |
| 21               | 6                | 0              | -0.920353               | 4.306053  | -0.351549 |
| 22               | 6                | 0              | 0.264712                | 2.323062  | 0.683159  |
| 23               | 6                | 0              | -0.335747               | 3.950512  | -1.726131 |
| 24               | 1                | 0              | -0.259931               | 5.020448  | 0.158333  |
| 25               | 1                | 0              | -1.889990               | 4.808317  | -0.466393 |
| 26               | 6                | 0              | 0.925257                | 1.971388  | -0.663009 |
| 27               | 1                | 0              | 0.954156                | 2.965794  | 1.243829  |
| 28               | 1                | 0              | 0.134893                | 1.410607  | 1.275156  |
| 29               | 6                | 0              | 1.002828                | 3.212011  | -1.577898 |
| 30               | 1                | 0              | -0.192628               | 4.858875  | -2.322820 |
| 31               | 1                | 0              | -1.050728               | 3.324690  | -2.271697 |
| 32               | 1                | 0              | 1.396896                | 2.922636  | -2.561949 |
| 33               | 1                | 0              | 1.743538                | 3.898729  | -1.144281 |

|    |   |   |           |           |           |
|----|---|---|-----------|-----------|-----------|
| 34 | 1 | 0 | 1.947169  | 1.638113  | -0.458985 |
| 35 | 1 | 0 | -1.379501 | 3.404699  | 1.550387  |
| 36 | 7 | 0 | -2.080359 | 2.163588  | -0.056894 |
| 37 | 1 | 0 | -2.252200 | 1.358010  | 0.543073  |
| 38 | 1 | 0 | -2.969270 | 2.644956  | -0.169536 |
| 39 | 7 | 0 | 0.213364  | 0.816963  | -1.291872 |
| 40 | 1 | 0 | -0.790755 | 1.028571  | -1.254239 |
| 41 | 1 | 0 | 0.470223  | 0.769307  | -2.278132 |
| 42 | 1 | 0 | 2.659624  | -0.209543 | -1.639010 |
| 43 | 1 | 0 | 2.371605  | -2.815804 | -0.041722 |
| 44 | 6 | 0 | 2.890949  | -0.998234 | 1.027709  |
| 45 | 6 | 0 | 2.498939  | -1.452063 | 2.300929  |
| 46 | 6 | 0 | 3.736342  | 0.122890  | 0.955900  |
| 47 | 6 | 0 | 2.911088  | -0.791665 | 3.456269  |
| 48 | 1 | 0 | 1.852185  | -2.322194 | 2.371743  |
| 49 | 6 | 0 | 4.148303  | 0.785005  | 2.112878  |
| 50 | 1 | 0 | 4.099318  | 0.458934  | -0.010926 |
| 51 | 6 | 0 | 3.733579  | 0.334835  | 3.367599  |
| 52 | 1 | 0 | 2.591289  | -1.157029 | 4.428172  |
| 53 | 1 | 0 | 4.807839  | 1.645003  | 2.033847  |
| 54 | 1 | 0 | 4.058333  | 0.848055  | 4.268095  |
| 55 | 6 | 0 | 2.277931  | -2.121106 | -2.685151 |
| 56 | 1 | 0 | 1.877275  | -3.100513 | -2.401055 |
| 57 | 1 | 0 | 1.564816  | -1.692523 | -3.403062 |
| 58 | 6 | 0 | 3.639597  | -2.296523 | -3.383375 |
| 59 | 1 | 0 | 4.362603  | -2.775101 | -2.714840 |
| 60 | 1 | 0 | 3.542474  | -2.917117 | -4.280423 |
| 61 | 1 | 0 | 4.057640  | -1.330628 | -3.689078 |

-----  
**IM11** (SCF energy in toluene: -1252.795164 a.u.; Free energy in toluene: -1252.326394 a.u.)  
 -----

| Center<br>Number | Atomic<br>Number | Atomic<br>Type | Coordinates (Angstroms) |           |           |
|------------------|------------------|----------------|-------------------------|-----------|-----------|
|                  |                  |                | X                       | Y         | Z         |
| 1                | 28               | 0              | -0.474198               | -0.938986 | -0.361491 |
| 2                | 6                | 0              | 3.263899                | -1.327035 | 1.564301  |
| 3                | 6                | 0              | 1.891946                | -1.279641 | 1.275970  |
| 4                | 6                | 0              | 1.391364                | -1.222463 | -0.035701 |
| 5                | 6                | 0              | 2.356282                | -1.263064 | -1.065267 |
| 6                | 6                | 0              | 3.727128                | -1.302812 | -0.804171 |
| 7                | 6                | 0              | 4.191087                | -1.333244 | 0.517918  |
| 8                | 1                | 0              | 3.589112                | -1.361557 | 2.598698  |
| 9                | 1                | 0              | 1.200929                | -1.279864 | 2.117178  |
| 10               | 1                | 0              | 4.455882                | -1.327708 | -1.609823 |



|    |   |   |           |           |           |
|----|---|---|-----------|-----------|-----------|
| 11 | 6 | 0 | -2.531726 | -0.869752 | -0.668946 |
| 12 | 6 | 0 | -2.056172 | -2.146514 | -0.984292 |
| 13 | 1 | 0 | -0.161045 | -2.333077 | -0.480383 |
| 14 | 1 | 0 | 2.035451  | -1.261408 | -2.105635 |
| 15 | 8 | 0 | 5.555540  | -1.374339 | 0.675270  |
| 16 | 6 | 0 | 6.066943  | -1.458209 | 1.991626  |
| 17 | 1 | 0 | 5.717427  | -2.361692 | 2.509456  |
| 18 | 1 | 0 | 7.153704  | -1.500145 | 1.894777  |
| 19 | 1 | 0 | 5.795388  | -0.580565 | 2.594806  |
| 20 | 6 | 0 | 1.872509  | 2.905584  | -1.171457 |
| 21 | 6 | 0 | 1.377612  | 4.291685  | -0.719249 |
| 22 | 6 | 0 | 0.744154  | 2.137281  | -1.890954 |
| 23 | 6 | 0 | 0.111999  | 4.201211  | 0.145629  |
| 24 | 1 | 0 | 1.170909  | 4.895013  | -1.613541 |
| 25 | 1 | 0 | 2.178126  | 4.810046  | -0.175092 |
| 26 | 6 | 0 | -0.562558 | 2.044708  | -1.080633 |
| 27 | 1 | 0 | 0.524808  | 2.655870  | -2.832453 |
| 28 | 1 | 0 | 1.086899  | 1.130674  | -2.152801 |
| 29 | 6 | 0 | -1.001159 | 3.440537  | -0.589780 |
| 30 | 1 | 0 | -0.237568 | 5.206261  | 0.408584  |
| 31 | 1 | 0 | 0.351303  | 3.695624  | 1.087803  |
| 32 | 1 | 0 | -1.891277 | 3.343445  | 0.044999  |
| 33 | 1 | 0 | -1.311571 | 4.021575  | -1.469678 |
| 34 | 1 | 0 | -1.348079 | 1.656467  | -1.738359 |
| 35 | 1 | 0 | 2.687856  | 3.056442  | -1.900361 |
| 36 | 7 | 0 | 2.316825  | 2.137961  | 0.004543  |
| 37 | 1 | 0 | 2.707238  | 1.240569  | -0.279009 |
| 38 | 1 | 0 | 3.052027  | 2.639260  | 0.497401  |
| 39 | 7 | 0 | -0.412725 | 1.059519  | 0.034350  |
| 40 | 1 | 0 | 0.477963  | 1.265568  | 0.500954  |
| 41 | 1 | 0 | -1.161251 | 1.213890  | 0.710945  |
| 42 | 1 | 0 | -2.697126 | -0.185994 | -1.502335 |
| 43 | 6 | 0 | -3.192690 | -0.478084 | 0.591450  |
| 44 | 6 | 0 | -3.915071 | 0.730624  | 0.644680  |
| 45 | 6 | 0 | -3.118723 | -1.244092 | 1.773274  |
| 46 | 6 | 0 | -4.540564 | 1.153857  | 1.818194  |
| 47 | 1 | 0 | -4.000346 | 1.334121  | -0.256442 |
| 48 | 6 | 0 | -3.744660 | -0.821051 | 2.943680  |
| 49 | 1 | 0 | -2.560212 | -2.175159 | 1.776877  |
| 50 | 6 | 0 | -4.459273 | 0.380202  | 2.976573  |
| 51 | 1 | 0 | -5.097136 | 2.087293  | 1.823310  |
| 52 | 1 | 0 | -3.671657 | -1.433281 | 3.838574  |
| 53 | 1 | 0 | -4.945274 | 0.705805  | 3.891454  |
| 54 | 1 | 0 | -2.228028 | -2.949825 | -0.269316 |

|    |   |   |           |           |           |
|----|---|---|-----------|-----------|-----------|
| 55 | 6 | 0 | -1.935937 | -2.617423 | -2.422726 |
| 56 | 1 | 0 | -1.123261 | -3.347068 | -2.506832 |
| 57 | 1 | 0 | -1.661952 | -1.771252 | -3.064313 |
| 58 | 6 | 0 | -3.244446 | -3.247701 | -2.929409 |
| 59 | 1 | 0 | -3.133415 | -3.601796 | -3.959775 |
| 60 | 1 | 0 | -3.535414 | -4.105080 | -2.312055 |
| 61 | 1 | 0 | -4.067537 | -2.526126 | -2.904557 |

-----  
**TS6** (SCF energy in toluene: -1252.794666 a.u.; Free energy in toluene: -1252.325385 a.u.)  
 -----

| Center<br>Number | Atomic<br>Number | Atomic<br>Type | Coordinates (Angstroms) |           |           |
|------------------|------------------|----------------|-------------------------|-----------|-----------|
|                  |                  |                | X                       | Y         | Z         |
| 1                | 28               | 0              | -0.461801               | -0.918841 | -0.356468 |
| 2                | 6                | 0              | 3.286034                | -1.308323 | 1.561366  |
| 3                | 6                | 0              | 1.913634                | -1.253353 | 1.275705  |
| 4                | 6                | 0              | 1.409072                | -1.192260 | -0.034409 |
| 5                | 6                | 0              | 2.372729                | -1.232088 | -1.065447 |
| 6                | 6                | 0              | 3.744161                | -1.278929 | -0.807861 |
| 7                | 6                | 0              | 4.210821                | -1.316129 | 0.512967  |
| 8                | 1                | 0              | 3.613379                | -1.346825 | 2.594984  |
| 9                | 1                | 0              | 1.225297                | -1.251180 | 2.119330  |
| 10               | 1                | 0              | 4.471120                | -1.303692 | -1.615180 |
| 11               | 6                | 0              | -2.508042               | -0.912795 | -0.671677 |
| 12               | 6                | 0              | -2.001918               | -2.192273 | -0.949396 |
| 13               | 1                | 0              | -0.199604               | -2.324409 | -0.502657 |
| 14               | 1                | 0              | 2.050790                | -1.224115 | -2.105655 |
| 15               | 8                | 0              | 5.575525                | -1.363928 | 0.667307  |
| 16               | 6                | 0              | 6.089133                | -1.454307 | 1.982299  |
| 17               | 1                | 0              | 5.736164                | -2.357588 | 2.498179  |
| 18               | 1                | 0              | 7.175498                | -1.501369 | 1.883187  |
| 19               | 1                | 0              | 5.823185                | -0.577179 | 2.588739  |
| 20               | 6                | 0              | 1.837330                | 2.932558  | -1.172414 |
| 21               | 6                | 0              | 1.331116                | 4.314644  | -0.720368 |
| 22               | 6                | 0              | 0.713876                | 2.153491  | -1.888021 |
| 23               | 6                | 0              | 0.068923                | 4.213687  | 0.148408  |
| 24               | 1                | 0              | 1.116323                | 4.914903  | -1.614805 |
| 25               | 1                | 0              | 2.128403                | 4.840997  | -0.179178 |
| 26               | 6                | 0              | -0.588796               | 2.048996  | -1.072812 |
| 27               | 1                | 0              | 0.486299                | 2.669864  | -2.828768 |
| 28               | 1                | 0              | 1.065114                | 1.150083  | -2.150898 |
| 29               | 6                | 0              | -1.039340               | 3.440824  | -0.581815 |
| 30               | 1                | 0              | -0.289577               | 5.215854  | 0.410308  |
| 31               | 1                | 0              | 0.315987                | 3.712713  | 1.091031  |

|    |   |   |           |           |           |
|----|---|---|-----------|-----------|-----------|
| 32 | 1 | 0 | -1.926270 | 3.335684  | 0.056077  |
| 33 | 1 | 0 | -1.358595 | 4.017463  | -1.461410 |
| 34 | 1 | 0 | -1.373232 | 1.650623  | -1.725597 |
| 35 | 1 | 0 | 2.649345  | 3.089812  | -1.903639 |
| 36 | 7 | 0 | 2.291631  | 2.170195  | 0.003263  |
| 37 | 1 | 0 | 2.686370  | 1.274495  | -0.279815 |
| 38 | 1 | 0 | 3.025311  | 2.677337  | 0.492367  |
| 39 | 7 | 0 | -0.423800 | 1.067502  | 0.043617  |
| 40 | 1 | 0 | 0.464243  | 1.286776  | 0.509555  |
| 41 | 1 | 0 | -1.175405 | 1.210883  | 0.719414  |
| 42 | 1 | 0 | -2.693364 | -0.262027 | -1.527220 |
| 43 | 6 | 0 | -3.188406 | -0.506117 | 0.572907  |
| 44 | 6 | 0 | -3.939359 | 0.686392  | 0.591915  |
| 45 | 6 | 0 | -3.103856 | -1.239460 | 1.774904  |
| 46 | 6 | 0 | -4.581655 | 1.124204  | 1.750782  |
| 47 | 1 | 0 | -4.032949 | 1.265021  | -0.324546 |
| 48 | 6 | 0 | -3.746933 | -0.801908 | 2.930721  |
| 49 | 1 | 0 | -2.524039 | -2.157040 | 1.805634  |
| 50 | 6 | 0 | -4.489807 | 0.382415  | 2.929213  |
| 51 | 1 | 0 | -5.159962 | 2.044128  | 1.728859  |
| 52 | 1 | 0 | -3.665162 | -1.389646 | 3.841175  |
| 53 | 1 | 0 | -4.989237 | 0.719462  | 3.832628  |
| 54 | 1 | 0 | -2.174588 | -2.977814 | -0.214369 |
| 55 | 6 | 0 | -1.893702 | -2.703028 | -2.376673 |
| 56 | 1 | 0 | -1.084581 | -3.438219 | -2.447310 |
| 57 | 1 | 0 | -1.620161 | -1.874962 | -3.041478 |
| 58 | 6 | 0 | -3.208522 | -3.339714 | -2.856475 |
| 59 | 1 | 0 | -3.106638 | -3.721510 | -3.877800 |
| 60 | 1 | 0 | -3.499197 | -4.178985 | -2.214574 |
| 61 | 1 | 0 | -4.027824 | -2.613617 | -2.844980 |

-----  
**IM12** (SCF energy in toluene: -1252.802446 a.u.; Free energy in toluene: -1252.331008 a.u.)  
 -----

| Center<br>Number | Atomic<br>Number | Atomic<br>Type | Coordinates (Angstroms) |           |           |
|------------------|------------------|----------------|-------------------------|-----------|-----------|
|                  |                  |                | X                       | Y         | Z         |
| 1                | 28               | 0              | -0.414572               | -0.711808 | -0.352447 |
| 2                | 6                | 0              | 3.392023                | -1.326037 | 1.498403  |
| 3                | 6                | 0              | 2.023163                | -1.154252 | 1.241477  |
| 4                | 6                | 0              | 1.489784                | -1.012198 | -0.053550 |
| 5                | 6                | 0              | 2.440390                | -1.063933 | -1.099847 |
| 6                | 6                | 0              | 3.808955                | -1.227141 | -0.876643 |
| 7                | 6                | 0              | 4.294079                | -1.360396 | 0.430750  |
| 8                | 1                | 0              | 3.735074                | -1.429971 | 2.522574  |

|    |   |   |           |           |           |
|----|---|---|-----------|-----------|-----------|
| 9  | 1 | 0 | 1.357439  | -1.127135 | 2.104117  |
| 10 | 1 | 0 | 4.518876  | -1.262847 | -1.698757 |
| 11 | 6 | 0 | -2.333041 | -1.019650 | -0.701758 |
| 12 | 6 | 0 | -1.698545 | -2.347203 | -0.901760 |
| 13 | 1 | 0 | -0.517382 | -2.302928 | -0.685069 |
| 14 | 1 | 0 | 2.109437  | -0.973045 | -2.134928 |
| 15 | 8 | 0 | 5.653777  | -1.515485 | 0.554789  |
| 16 | 6 | 0 | 6.183816  | -1.685249 | 1.855254  |
| 17 | 1 | 0 | 5.778048  | -2.578496 | 2.349418  |
| 18 | 1 | 0 | 7.262232  | -1.804450 | 1.732322  |
| 19 | 1 | 0 | 5.990923  | -0.812425 | 2.494532  |
| 20 | 6 | 0 | 1.750258  | 3.125879  | -0.993046 |
| 21 | 6 | 0 | 1.184181  | 4.483116  | -0.536896 |
| 22 | 6 | 0 | 0.682728  | 2.331157  | -1.773705 |
| 23 | 6 | 0 | -0.111428 | 4.328217  | 0.273256  |
| 24 | 1 | 0 | 0.991811  | 5.095084  | -1.428472 |
| 25 | 1 | 0 | 1.940384  | 5.020994  | 0.049816  |
| 26 | 6 | 0 | -0.644400 | 2.165509  | -1.011607 |
| 27 | 1 | 0 | 0.472670  | 2.865537  | -2.708295 |
| 28 | 1 | 0 | 1.076992  | 1.347264  | -2.048381 |
| 29 | 6 | 0 | -1.162602 | 3.529887  | -0.512968 |
| 30 | 1 | 0 | -0.514307 | 5.314140  | 0.531805  |
| 31 | 1 | 0 | 0.111760  | 3.823961  | 1.220102  |
| 32 | 1 | 0 | -2.070035 | 3.382654  | 0.086486  |
| 33 | 1 | 0 | -1.467696 | 4.109206  | -1.395481 |
| 34 | 1 | 0 | -1.390401 | 1.741564  | -1.690949 |
| 35 | 1 | 0 | 2.590148  | 3.320228  | -1.682077 |
| 36 | 7 | 0 | 2.171437  | 2.348346  | 0.185841  |
| 37 | 1 | 0 | 2.582700  | 1.460267  | -0.097893 |
| 38 | 1 | 0 | 2.881188  | 2.853918  | 0.710509  |
| 39 | 7 | 0 | -0.482396 | 1.177886  | 0.103802  |
| 40 | 1 | 0 | 0.367579  | 1.437986  | 0.620169  |
| 41 | 1 | 0 | -1.284093 | 1.258475  | 0.732215  |
| 42 | 1 | 0 | -2.674875 | -0.541751 | -1.623049 |
| 43 | 6 | 0 | -3.157597 | -0.689677 | 0.471478  |
| 44 | 6 | 0 | -4.044717 | 0.409086  | 0.414905  |
| 45 | 6 | 0 | -3.062503 | -1.370469 | 1.706345  |
| 46 | 6 | 0 | -4.793045 | 0.803983  | 1.522765  |
| 47 | 1 | 0 | -4.154628 | 0.946097  | -0.525152 |
| 48 | 6 | 0 | -3.814873 | -0.976386 | 2.811534  |
| 49 | 1 | 0 | -2.388753 | -2.217286 | 1.803805  |
| 50 | 6 | 0 | -4.685115 | 0.114030  | 2.732413  |
| 51 | 1 | 0 | -5.470900 | 1.649637  | 1.437106  |
| 52 | 1 | 0 | -3.718711 | -1.526715 | 3.744052  |

|    |   |   |           |           |           |
|----|---|---|-----------|-----------|-----------|
| 53 | 1 | 0 | -5.270036 | 0.417236  | 3.595561  |
| 54 | 1 | 0 | -1.983373 | -3.091315 | -0.148988 |
| 55 | 6 | 0 | -1.773423 | -2.943922 | -2.316701 |
| 56 | 1 | 0 | -1.034231 | -3.748606 | -2.414946 |
| 57 | 1 | 0 | -1.488479 | -2.171809 | -3.042105 |
| 58 | 6 | 0 | -3.168669 | -3.483255 | -2.648361 |
| 59 | 1 | 0 | -3.195916 | -3.903780 | -3.658793 |
| 60 | 1 | 0 | -3.462166 | -4.274829 | -1.949586 |
| 61 | 1 | 0 | -3.923276 | -2.692574 | -2.589364 |

-----  
**IM13** (SCF energy in toluene: -1252.826971 a.u; Free energy in toluene: -1252.351793 a.u.)  
 -----

| Center<br>Number | Atomic<br>Number | Atomic<br>Type | Coordinates (Angstroms) |           |           |
|------------------|------------------|----------------|-------------------------|-----------|-----------|
|                  |                  |                | X                       | Y         | Z         |
| 1                | 28               | 0              | -0.170279               | 0.468487  | -0.347745 |
| 2                | 6                | 0              | -0.544663               | -3.166681 | 2.008769  |
| 3                | 6                | 0              | -0.298264               | -3.382640 | 3.505848  |
| 4                | 1                | 0              | -1.039558               | -2.847357 | 4.112048  |
| 5                | 1                | 0              | 0.692128                | -3.016421 | 3.801221  |
| 6                | 6                | 0              | 1.658187                | -0.077050 | -0.449320 |
| 7                | 6                | 0              | 2.188992                | -0.813151 | -1.533038 |
| 8                | 6                | 0              | 2.596108                | 0.326664  | 0.518950  |
| 9                | 6                | 0              | 3.544196                | -1.115944 | -1.646036 |
| 10               | 1                | 0              | 1.521635                | -1.174956 | -2.313940 |
| 11               | 6                | 0              | 3.965935                | 0.023178  | 0.438621  |
| 12               | 1                | 0              | 2.263055                | 0.886340  | 1.394259  |
| 13               | 6                | 0              | 4.444335                | -0.701338 | -0.654955 |
| 14               | 1                | 0              | 3.929848                | -1.681936 | -2.489710 |
| 15               | 1                | 0              | 4.633395                | 0.352053  | 1.228280  |
| 16               | 8                | 0              | 5.758184                | -1.053926 | -0.851554 |
| 17               | 6                | 0              | 6.696264                | -0.684029 | 0.139376  |
| 18               | 1                | 0              | 6.457896                | -1.127735 | 1.115904  |
| 19               | 1                | 0              | 7.663084                | -1.063524 | -0.197764 |
| 20               | 1                | 0              | 6.761673                | 0.406881  | 0.256424  |
| 21               | 6                | 0              | -0.444336               | -1.687295 | 1.585533  |
| 22               | 1                | 0              | -1.139760               | -1.095569 | 2.202217  |
| 23               | 6                | 0              | -0.673680               | -1.424183 | 0.088512  |
| 24               | 1                | 0              | 0.556313                | -1.325230 | 1.847475  |
| 25               | 1                | 0              | 0.048934                | -2.015888 | -0.481241 |
| 26               | 6                | 0              | -2.037062               | -1.752003 | -0.433718 |
| 27               | 6                | 0              | -2.218965               | -2.014894 | -1.811750 |
| 28               | 6                | 0              | -3.204105               | -1.760481 | 0.363130  |
| 29               | 6                | 0              | -3.476407               | -2.251721 | -2.359060 |

|    |   |   |           |           |           |
|----|---|---|-----------|-----------|-----------|
| 30 | 1 | 0 | -1.341305 | -2.034469 | -2.454449 |
| 31 | 6 | 0 | -4.469897 | -1.998521 | -0.184696 |
| 32 | 1 | 0 | -3.120213 | -1.604275 | 1.435482  |
| 33 | 6 | 0 | -4.619000 | -2.240014 | -1.549155 |
| 34 | 1 | 0 | -3.568598 | -2.455948 | -3.423214 |
| 35 | 1 | 0 | -5.340845 | -2.005124 | 0.466669  |
| 36 | 1 | 0 | -5.600221 | -2.429509 | -1.974515 |
| 37 | 1 | 0 | -1.528764 | -3.567815 | 1.737100  |
| 38 | 1 | 0 | -0.354404 | -4.442780 | 3.776848  |
| 39 | 1 | 0 | 0.188747  | -3.743692 | 1.429711  |
| 40 | 6 | 0 | -0.194677 | 3.614509  | -0.418314 |
| 41 | 6 | 0 | 0.000629  | 3.830807  | 1.092116  |
| 42 | 6 | 0 | -1.686226 | 3.555716  | -0.778940 |
| 43 | 6 | 0 | -0.758748 | 2.803470  | 1.943585  |
| 44 | 1 | 0 | -0.354501 | 4.842081  | 1.330651  |
| 45 | 1 | 0 | 1.071116  | 3.814557  | 1.331570  |
| 46 | 6 | 0 | -2.476199 | 2.538771  | 0.059595  |
| 47 | 1 | 0 | -2.121322 | 4.549268  | -0.619129 |
| 48 | 1 | 0 | -1.807151 | 3.335558  | -1.848733 |
| 49 | 6 | 0 | -2.245602 | 2.761314  | 1.564839  |
| 50 | 1 | 0 | -0.652460 | 3.049932  | 3.005876  |
| 51 | 1 | 0 | -0.316539 | 1.809281  | 1.801972  |
| 52 | 1 | 0 | -2.765846 | 1.982230  | 2.135518  |
| 53 | 1 | 0 | -2.721654 | 3.713019  | 1.836265  |
| 54 | 1 | 0 | -3.545850 | 2.689383  | -0.146632 |
| 55 | 1 | 0 | 0.253865  | 4.467813  | -0.947679 |
| 56 | 7 | 0 | 0.477394  | 2.362300  | -0.851975 |
| 57 | 1 | 0 | 0.508443  | 2.320607  | -1.871207 |
| 58 | 1 | 0 | 1.452963  | 2.355801  | -0.553469 |
| 59 | 7 | 0 | -2.106035 | 1.151474  | -0.325831 |
| 60 | 1 | 0 | -2.657879 | 0.487287  | 0.218394  |
| 61 | 1 | 0 | -2.404313 | 0.980580  | -1.287647 |

-----  
**TS7** (SCF energy in toluene: -1252.781713 a.u.; Free energy in toluene: -1252.306843 a.u.)  
 -----

| Center<br>Number | Atomic<br>Number | Atomic<br>Type | Coordinates (Angstroms) |           |           |
|------------------|------------------|----------------|-------------------------|-----------|-----------|
|                  |                  |                | X                       | Y         | Z         |
| 1                | 28               | 0              | 0.506609                | -0.270509 | -0.266221 |
| 2                | 6                | 0              | 0.860255                | 4.234283  | 0.748686  |
| 3                | 6                | 0              | 0.614976                | 5.151855  | 1.951266  |
| 4                | 1                | 0              | 1.025222                | 4.718357  | 2.871161  |
| 5                | 1                | 0              | -0.456627               | 5.315236  | 2.114719  |
| 6                | 6                | 0              | -1.068164               | 0.760813  | -0.427468 |

|    |   |   |           |           |           |
|----|---|---|-----------|-----------|-----------|
| 7  | 6 | 0 | -1.781438 | 0.837360  | -1.662026 |
| 8  | 6 | 0 | -1.879579 | 0.635915  | 0.730196  |
| 9  | 6 | 0 | -3.159692 | 0.706329  | -1.735280 |
| 10 | 1 | 0 | -1.227059 | 0.997196  | -2.585994 |
| 11 | 6 | 0 | -3.274537 | 0.496954  | 0.667547  |
| 12 | 1 | 0 | -1.413238 | 0.649129  | 1.712004  |
| 13 | 6 | 0 | -3.924479 | 0.524410  | -0.567574 |
| 14 | 1 | 0 | -3.678439 | 0.753280  | -2.689054 |
| 15 | 1 | 0 | -3.834305 | 0.386148  | 1.590444  |
| 16 | 8 | 0 | -5.282351 | 0.408818  | -0.753467 |
| 17 | 6 | 0 | -6.092000 | 0.261112  | 0.395474  |
| 18 | 1 | 0 | -6.003989 | 1.122518  | 1.072234  |
| 19 | 1 | 0 | -7.121639 | 0.191996  | 0.038498  |
| 20 | 1 | 0 | -5.845908 | -0.651446 | 0.956929  |
| 21 | 6 | 0 | 0.195191  | 2.855211  | 0.904611  |
| 22 | 1 | 0 | 0.549820  | 2.377390  | 1.827796  |
| 23 | 6 | 0 | 0.420877  | 1.938123  | -0.295052 |
| 24 | 1 | 0 | -0.882648 | 2.999100  | 1.042325  |
| 25 | 1 | 0 | 0.110770  | 2.451936  | -1.206832 |
| 26 | 6 | 0 | 1.801557  | 1.416530  | -0.498058 |
| 27 | 6 | 0 | 2.186777  | 0.953707  | -1.799963 |
| 28 | 6 | 0 | 2.844703  | 1.495210  | 0.477967  |
| 29 | 6 | 0 | 3.475489  | 0.483168  | -2.051850 |
| 30 | 1 | 0 | 1.472311  | 1.026217  | -2.616348 |
| 31 | 6 | 0 | 4.126338  | 1.033778  | 0.204559  |
| 32 | 1 | 0 | 2.632295  | 1.916948  | 1.455500  |
| 33 | 6 | 0 | 4.455308  | 0.492857  | -1.051497 |
| 34 | 1 | 0 | 3.726127  | 0.130109  | -3.049965 |
| 35 | 1 | 0 | 4.892028  | 1.110738  | 0.973853  |
| 36 | 1 | 0 | 5.463145  | 0.146020  | -1.257991 |
| 37 | 1 | 0 | 1.938587  | 4.113852  | 0.591336  |
| 38 | 1 | 0 | 1.083246  | 6.131788  | 1.809938  |
| 39 | 1 | 0 | 0.470315  | 4.711788  | -0.160461 |
| 40 | 6 | 0 | -0.098330 | -3.365595 | -0.612913 |
| 41 | 6 | 0 | -0.968802 | -3.611834 | 0.631123  |
| 42 | 6 | 0 | 1.391668  | -3.604971 | -0.309895 |
| 43 | 6 | 0 | -0.479355 | -2.857502 | 1.874720  |
| 44 | 1 | 0 | -0.959167 | -4.691875 | 0.831492  |
| 45 | 1 | 0 | -2.010260 | -3.347911 | 0.408208  |
| 46 | 6 | 0 | 1.910840  | -2.887317 | 0.949980  |
| 47 | 1 | 0 | 1.540456  | -4.683144 | -0.172181 |
| 48 | 1 | 0 | 2.000237  | -3.318534 | -1.177998 |
| 49 | 6 | 0 | 0.998016  | -3.160850 | 2.157504  |
| 50 | 1 | 0 | -1.088750 | -3.141060 | 2.740793  |

|    |   |   |           |           |           |
|----|---|---|-----------|-----------|-----------|
| 51 | 1 | 0 | -0.616315 | -1.781636 | 1.725443  |
| 52 | 1 | 0 | 1.351759  | -2.584537 | 3.022456  |
| 53 | 1 | 0 | 1.109641  | -4.219644 | 2.428006  |
| 54 | 1 | 0 | 2.903877  | -3.304873 | 1.180743  |
| 55 | 1 | 0 | -0.403560 | -4.092642 | -1.381403 |
| 56 | 7 | 0 | -0.301490 | -1.988747 | -1.134132 |
| 57 | 1 | 0 | 0.088937  | -1.926219 | -2.073781 |
| 58 | 1 | 0 | -1.296559 | -1.789521 | -1.233643 |
| 59 | 7 | 0 | 2.031735  | -1.431231 | 0.701155  |
| 60 | 1 | 0 | 2.291873  | -0.952595 | 1.561732  |
| 61 | 1 | 0 | 2.816134  | -1.257844 | 0.070466  |

-----  
**IM14** (SCF energy in toluene: -1252.823928 a.u.; Free energy in toluene: -1252.347965 a.u.)  
 -----

| Center<br>Number | Atomic<br>Number | Atomic<br>Type | Coordinates (Angstroms) |           |           |
|------------------|------------------|----------------|-------------------------|-----------|-----------|
|                  |                  |                | X                       | Y         | Z         |
| 1                | 28               | 0              | -1.047263               | -0.354825 | 0.558372  |
| 2                | 6                | 0              | 1.974336                | -2.005325 | -0.869056 |
| 3                | 6                | 0              | 1.842886                | -0.855832 | 0.158247  |
| 4                | 1                | 0              | 0.968862                | -2.392801 | -1.086279 |
| 5                | 6                | 0              | 3.183865                | -0.148217 | 0.365981  |
| 6                | 6                | 0              | 3.895462                | -0.309283 | 1.563144  |
| 7                | 6                | 0              | 3.746006                | 0.671513  | -0.625919 |
| 8                | 6                | 0              | 5.127345                | 0.317776  | 1.766669  |
| 9                | 1                | 0              | 3.477201                | -0.936632 | 2.347327  |
| 10               | 6                | 0              | 4.975630                | 1.298839  | -0.428618 |
| 11               | 1                | 0              | 3.203264                | 0.837708  | -1.551676 |
| 12               | 6                | 0              | 5.674373                | 1.123839  | 0.768742  |
| 13               | 1                | 0              | 5.656813                | 0.175926  | 2.705407  |
| 14               | 1                | 0              | 5.387703                | 1.931568  | -1.210512 |
| 15               | 1                | 0              | 6.631350                | 1.615015  | 0.922279  |
| 16               | 1                | 0              | 1.591059                | -1.322874 | 1.119588  |
| 17               | 1                | 0              | 2.363798                | -1.614467 | -1.818181 |
| 18               | 6                | 0              | 0.022139                | 1.843252  | -1.830511 |
| 19               | 6                | 0              | 0.547022                | 0.614666  | -1.529326 |
| 20               | 6                | 0              | 0.697939                | 0.128310  | -0.171028 |
| 21               | 6                | 0              | 0.230791                | 1.046896  | 0.885608  |
| 22               | 6                | 0              | -0.194087               | 2.394829  | 0.529228  |
| 23               | 6                | 0              | -0.330542               | 2.759998  | -0.784226 |
| 24               | 1                | 0              | -0.096331               | 2.173610  | -2.858186 |
| 25               | 1                | 0              | 0.877169                | -0.016793 | -2.352839 |
| 26               | 1                | 0              | 0.695285                | 0.959622  | 1.872632  |
| 27               | 1                | 0              | -0.373921               | 3.107102  | 1.329044  |



|    |   |   |           |           |           |
|----|---|---|-----------|-----------|-----------|
| 28 | 8 | 0 | -0.758437 | 3.989845  | -1.240286 |
| 29 | 6 | 0 | -1.051057 | 4.972285  | -0.271690 |
| 30 | 1 | 0 | -0.171504 | 5.218209  | 0.340179  |
| 31 | 1 | 0 | -1.368130 | 5.863464  | -0.818128 |
| 32 | 1 | 0 | -1.862324 | 4.655414  | 0.400953  |
| 33 | 6 | 0 | 2.867531  | -3.166187 | -0.411956 |
| 34 | 1 | 0 | 3.867782  | -2.784991 | -0.174674 |
| 35 | 1 | 0 | 2.470460  | -3.580866 | 0.525665  |
| 36 | 6 | 0 | 2.979565  | -4.282247 | -1.455847 |
| 37 | 1 | 0 | 3.411464  | -3.907381 | -2.390919 |
| 38 | 1 | 0 | 3.615716  | -5.100621 | -1.102088 |
| 39 | 1 | 0 | 1.996710  | -4.706443 | -1.695363 |
| 40 | 6 | 0 | -3.322467 | -2.227378 | -0.354955 |
| 41 | 6 | 0 | -3.950949 | -1.297875 | -1.407852 |
| 42 | 6 | 0 | -3.935662 | -1.987291 | 1.037893  |
| 43 | 6 | 0 | -3.934596 | 0.180619  | -0.996502 |
| 44 | 1 | 0 | -4.988527 | -1.624820 | -1.560136 |
| 45 | 1 | 0 | -3.441189 | -1.436460 | -2.369978 |
| 46 | 6 | 0 | -3.986538 | -0.510680 | 1.473315  |
| 47 | 1 | 0 | -4.963296 | -2.370545 | 1.023196  |
| 48 | 1 | 0 | -3.398062 | -2.580230 | 1.790477  |
| 49 | 6 | 0 | -4.600957 | 0.371923  | 0.372863  |
| 50 | 1 | 0 | -4.459294 | 0.779378  | -1.749531 |
| 51 | 1 | 0 | -2.900679 | 0.545104  | -0.961171 |
| 52 | 1 | 0 | -4.555976 | 1.424819  | 0.679286  |
| 53 | 1 | 0 | -5.667118 | 0.117458  | 0.301239  |
| 54 | 1 | 0 | -4.636652 | -0.445821 | 2.359713  |
| 55 | 1 | 0 | -3.550426 | -3.265202 | -0.644015 |
| 56 | 7 | 0 | -1.847061 | -2.040768 | -0.312024 |
| 57 | 1 | 0 | -1.422644 | -2.804715 | 0.214075  |
| 58 | 1 | 0 | -1.469120 | -2.104962 | -1.255548 |
| 59 | 7 | 0 | -2.622923 | -0.032205 | 1.821780  |
| 60 | 1 | 0 | -2.637336 | 0.973154  | 1.986194  |
| 61 | 1 | 0 | -2.319589 | -0.460340 | 2.696350  |

-----  
**IM15** (SCF energy in toluene: -1252.812426 a.u.; Free energy in toluene: -1252.338819 a.u.)  
 -----

| Center<br>Number | Atomic<br>Number | Atomic<br>Type | Coordinates (Angstroms) |           |           |
|------------------|------------------|----------------|-------------------------|-----------|-----------|
|                  |                  |                | X                       | Y         | Z         |
| 1                | 28               | 0              | -0.758328               | -0.654535 | -0.324959 |
| 2                | 6                | 0              | 1.115664                | -0.758190 | 0.260420  |
| 3                | 6                | 0              | 2.092326                | 0.051223  | -0.629529 |
| 4                | 1                | 0              | 1.929241                | 1.118542  | -0.453091 |

|    |   |   |           |           |           |
|----|---|---|-----------|-----------|-----------|
| 5  | 6 | 0 | -3.742925 | -1.580736 | -0.815794 |
| 6  | 6 | 0 | -4.205345 | -1.662282 | 0.648984  |
| 7  | 6 | 0 | -3.169032 | -2.924724 | -1.292719 |
| 8  | 6 | 0 | -3.116779 | -2.194538 | 1.591242  |
| 9  | 1 | 0 | -5.079923 | -2.325374 | 0.686374  |
| 10 | 1 | 0 | -4.552643 | -0.675540 | 0.979718  |
| 11 | 6 | 0 | -2.088965 | -3.499779 | -0.361766 |
| 12 | 1 | 0 | -3.989447 | -3.649576 | -1.354486 |
| 13 | 1 | 0 | -2.771325 | -2.822620 | -2.311712 |
| 14 | 6 | 0 | -2.574616 | -3.543076 | 1.097165  |
| 15 | 1 | 0 | -3.523336 | -2.307320 | 2.602364  |
| 16 | 1 | 0 | -2.297367 | -1.468640 | 1.657553  |
| 17 | 1 | 0 | -1.762037 | -3.894059 | 1.745866  |
| 18 | 1 | 0 | -3.366684 | -4.301094 | 1.159409  |
| 19 | 1 | 0 | -1.881949 | -4.531606 | -0.681115 |
| 20 | 1 | 0 | -4.620034 | -1.345523 | -1.436362 |
| 21 | 7 | 0 | -2.724723 | -0.512425 | -0.976781 |
| 22 | 1 | 0 | -2.601848 | -0.293758 | -1.965796 |
| 23 | 1 | 0 | -3.044204 | 0.356767  | -0.550362 |
| 24 | 7 | 0 | -0.836256 | -2.702685 | -0.468786 |
| 25 | 1 | 0 | -0.152198 | -3.052066 | 0.201118  |
| 26 | 1 | 0 | -0.414573 | -2.858538 | -1.385513 |
| 27 | 6 | 0 | -0.757057 | 1.249447  | -0.261687 |
| 28 | 6 | 0 | -0.546950 | 2.037770  | -1.417334 |
| 29 | 6 | 0 | -1.145210 | 1.961516  | 0.887503  |
| 30 | 6 | 0 | -0.709028 | 3.422526  | -1.426789 |
| 31 | 1 | 0 | -0.225910 | 1.561742  | -2.343415 |
| 32 | 6 | 0 | -1.314132 | 3.355916  | 0.907288  |
| 33 | 1 | 0 | -1.310988 | 1.426842  | 1.822198  |
| 34 | 6 | 0 | -1.095551 | 4.092970  | -0.259156 |
| 35 | 1 | 0 | -0.535645 | 4.007367  | -2.326212 |
| 36 | 1 | 0 | -1.607423 | 3.844486  | 1.830833  |
| 37 | 8 | 0 | -1.231781 | 5.457258  | -0.366005 |
| 38 | 6 | 0 | -1.595940 | 6.176130  | 0.795423  |
| 39 | 1 | 0 | -0.856526 | 6.058325  | 1.599623  |
| 40 | 1 | 0 | -1.640107 | 7.227487  | 0.503384  |
| 41 | 1 | 0 | -2.580112 | 5.869489  | 1.176822  |
| 42 | 6 | 0 | 1.221325  | -0.442890 | 1.769033  |
| 43 | 1 | 0 | 0.278011  | -0.720010 | 2.264177  |
| 44 | 1 | 0 | 1.300723  | 0.643867  | 1.899870  |
| 45 | 6 | 0 | 2.360125  | -1.138921 | 2.537639  |
| 46 | 1 | 0 | 2.289606  | -2.229957 | 2.438153  |
| 47 | 1 | 0 | 3.346042  | -0.842877 | 2.172576  |
| 48 | 1 | 0 | 1.394542  | -1.823699 | 0.130942  |

|    |   |   |          |           |           |
|----|---|---|----------|-----------|-----------|
| 49 | 1 | 0 | 1.820696 | -0.120932 | -1.680741 |
| 50 | 1 | 0 | 2.312456 | -0.903754 | 3.608429  |
| 51 | 6 | 0 | 3.574190 | -0.251594 | -0.480379 |
| 52 | 6 | 0 | 4.449174 | 0.672922  | 0.108417  |
| 53 | 6 | 0 | 4.116828 | -1.461133 | -0.942291 |
| 54 | 6 | 0 | 5.811076 | 0.395958  | 0.247695  |
| 55 | 1 | 0 | 4.053314 | 1.621712  | 0.463066  |
| 56 | 6 | 0 | 5.475825 | -1.744540 | -0.808161 |
| 57 | 1 | 0 | 3.461976 | -2.188846 | -1.417799 |
| 58 | 6 | 0 | 6.330731 | -0.816322 | -0.208386 |
| 59 | 1 | 0 | 6.466588 | 1.129968  | 0.709455  |
| 60 | 1 | 0 | 5.870864 | -2.688172 | -1.176411 |
| 61 | 1 | 0 | 7.390112 | -1.033873 | -0.103970 |

-----  
**IM16** (SCF energy in toluene: -1252.815202 a.u.; Free energy in toluene: -1252.343767 a.u.)  
 -----

| Center<br>Number | Atomic<br>Number | Atomic<br>Type | Coordinates (Angstroms) |           |           |
|------------------|------------------|----------------|-------------------------|-----------|-----------|
|                  |                  |                | X                       | Y         | Z         |
| 1                | 28               | 0              | -1.462711               | -0.600505 | -0.221085 |
| 2                | 6                | 0              | 1.289003                | -0.910862 | -1.084799 |
| 3                | 6                | 0              | -1.196652               | 1.279019  | -0.156531 |
| 4                | 6                | 0              | -1.186956               | 2.057990  | -1.336890 |
| 5                | 6                | 0              | -1.089607               | 2.004588  | 1.043546  |
| 6                | 6                | 0              | -1.080878               | 3.449077  | -1.323521 |
| 7                | 1                | 0              | -1.245956               | 1.567872  | -2.309573 |
| 8                | 6                | 0              | -0.992244               | 3.403599  | 1.087030  |
| 9                | 1                | 0              | -1.065657               | 1.469971  | 1.992200  |
| 10               | 6                | 0              | -0.986322               | 4.132712  | -0.105640 |
| 11               | 1                | 0              | -1.065000               | 4.026076  | -2.244362 |
| 12               | 1                | 0              | -0.913115               | 3.902934  | 2.047147  |
| 13               | 8                | 0              | -0.892027               | 5.502500  | -0.190372 |
| 14               | 6                | 0              | -0.764178               | 6.230685  | 1.014415  |
| 15               | 1                | 0              | 0.140246                | 5.948305  | 1.570866  |
| 16               | 1                | 0              | -0.693160               | 7.282730  | 0.730004  |
| 17               | 1                | 0              | -1.635483               | 6.096092  | 1.670725  |
| 18               | 6                | 0              | 0.415786                | -0.878268 | 0.179138  |
| 19               | 1                | 0              | 0.778681                | -0.107705 | 0.867146  |
| 20               | 1                | 0              | 1.213913                | 0.055545  | -1.601556 |
| 21               | 1                | 0              | 0.531374                | -1.842302 | 0.715892  |
| 22               | 6                | 0              | 2.781076                | -1.239099 | -0.861180 |
| 23               | 1                | 0              | 2.871702                | -2.197256 | -0.329689 |
| 24               | 1                | 0              | 3.275518                | -1.381089 | -1.832567 |
| 25               | 6                | 0              | 3.552202                | -0.158517 | -0.075598 |

|    |   |   |           |           |           |
|----|---|---|-----------|-----------|-----------|
| 26 | 1 | 0 | 3.451761  | 0.799025  | -0.602676 |
| 27 | 1 | 0 | 3.085843  | -0.023953 | 0.906397  |
| 28 | 6 | 0 | 5.017789  | -0.492283 | 0.098918  |
| 29 | 6 | 0 | 5.965126  | -0.105011 | -0.859716 |
| 30 | 6 | 0 | 5.462610  | -1.230277 | 1.205187  |
| 31 | 6 | 0 | 7.311710  | -0.444428 | -0.721045 |
| 32 | 1 | 0 | 5.641069  | 0.473857  | -1.721791 |
| 33 | 6 | 0 | 6.807777  | -1.573212 | 1.349459  |
| 34 | 1 | 0 | 4.744111  | -1.534014 | 1.963354  |
| 35 | 6 | 0 | 7.738578  | -1.181631 | 0.385244  |
| 36 | 1 | 0 | 8.028632  | -0.129053 | -1.474622 |
| 37 | 1 | 0 | 7.130207  | -2.142110 | 2.217673  |
| 38 | 1 | 0 | 8.786910  | -1.444096 | 0.497255  |
| 39 | 1 | 0 | 0.897257  | -1.656697 | -1.796097 |
| 40 | 6 | 0 | -4.528975 | -1.229740 | -0.522082 |
| 41 | 6 | 0 | -4.889792 | -1.314075 | 0.970683  |
| 42 | 6 | 0 | -4.115792 | -2.604902 | -1.072685 |
| 43 | 6 | 0 | -3.791701 | -1.974040 | 1.816435  |
| 44 | 1 | 0 | -5.817409 | -1.895574 | 1.055417  |
| 45 | 1 | 0 | -5.118203 | -0.310501 | 1.350641  |
| 46 | 6 | 0 | -3.030770 | -3.306447 | -0.238411 |
| 47 | 1 | 0 | -5.002487 | -3.249715 | -1.092720 |
| 48 | 1 | 0 | -3.784106 | -2.507732 | -2.115574 |
| 49 | 6 | 0 | -3.415378 | -3.350454 | 1.250379  |
| 50 | 1 | 0 | -4.135511 | -2.081416 | 2.851273  |
| 51 | 1 | 0 | -2.905104 | -1.328227 | 1.841680  |
| 52 | 1 | 0 | -2.595883 | -3.795065 | 1.829199  |
| 53 | 1 | 0 | -4.268814 | -4.034144 | 1.351066  |
| 54 | 1 | 0 | -2.944858 | -4.342347 | -0.597793 |
| 55 | 1 | 0 | -5.423970 | -0.899927 | -1.069679 |
| 56 | 7 | 0 | -3.433636 | -0.249527 | -0.735541 |
| 57 | 1 | 0 | -3.365780 | -0.014822 | -1.726039 |
| 58 | 1 | 0 | -3.644432 | 0.631099  | -0.267766 |
| 59 | 7 | 0 | -1.722047 | -2.621851 | -0.415825 |
| 60 | 1 | 0 | -1.029164 | -3.038027 | 0.204561  |
| 61 | 1 | 0 | -1.375687 | -2.790495 | -1.361086 |

-----  
**TS8** (SCF energy in toluene: -1252.769126 a.u.; Free energy in toluene: -1252.296576 a.u.)  
 -----

| Center<br>Number | Atomic<br>Number | Atomic<br>Type | Coordinates (Angstroms) |           |           |
|------------------|------------------|----------------|-------------------------|-----------|-----------|
|                  |                  |                | X                       | Y         | Z         |
| 1                | 28               | 0              | -0.482163               | -0.731781 | -0.263144 |
| 2                | 6                | 0              | 1.187311                | 0.407266  | 0.347152  |

|    |   |   |           |           |           |
|----|---|---|-----------|-----------|-----------|
| 3  | 6 | 0 | 2.210082  | 1.048912  | -0.620924 |
| 4  | 1 | 0 | 2.177683  | 2.139277  | -0.503392 |
| 5  | 6 | 0 | -3.201280 | -2.171328 | -0.898764 |
| 6  | 6 | 0 | -3.706857 | -2.369472 | 0.540666  |
| 7  | 6 | 0 | -2.367389 | -3.379724 | -1.365125 |
| 8  | 6 | 0 | -2.582184 | -2.725067 | 1.521835  |
| 9  | 1 | 0 | -4.450566 | -3.177461 | 0.526929  |
| 10 | 1 | 0 | -4.236610 | -1.467019 | 0.870391  |
| 11 | 6 | 0 | -1.266415 | -3.823928 | -0.383176 |
| 12 | 1 | 0 | -3.049362 | -4.226412 | -1.511122 |
| 13 | 1 | 0 | -1.925647 | -3.169817 | -2.348881 |
| 14 | 6 | 0 | -1.816032 | -3.966471 | 1.046671  |
| 15 | 1 | 0 | -2.999438 | -2.904473 | 2.519135  |
| 16 | 1 | 0 | -1.891836 | -1.876817 | 1.608052  |
| 17 | 1 | 0 | -0.993143 | -4.200675 | 1.734379  |
| 18 | 1 | 0 | -2.485255 | -4.837128 | 1.061142  |
| 19 | 1 | 0 | -0.914217 | -4.815450 | -0.707996 |
| 20 | 1 | 0 | -4.079946 | -2.097396 | -1.557489 |
| 21 | 7 | 0 | -2.395825 | -0.927969 | -0.995492 |
| 22 | 1 | 0 | -2.267393 | -0.667537 | -1.973707 |
| 23 | 1 | 0 | -2.887699 | -0.143731 | -0.566467 |
| 24 | 7 | 0 | -0.133528 | -2.860157 | -0.406570 |
| 25 | 1 | 0 | 0.568662  | -3.154468 | 0.272008  |
| 26 | 1 | 0 | 0.324986  | -2.907336 | -1.316638 |
| 27 | 6 | 0 | -0.433172 | 1.123526  | -0.097888 |
| 28 | 6 | 0 | -0.508044 | 1.874210  | -1.326990 |
| 29 | 6 | 0 | -1.179097 | 1.715468  | 0.975812  |
| 30 | 6 | 0 | -1.245602 | 3.042439  | -1.460006 |
| 31 | 1 | 0 | 0.021576  | 1.515999  | -2.205559 |
| 32 | 6 | 0 | -1.923244 | 2.892854  | 0.841487  |
| 33 | 1 | 0 | -1.189872 | 1.231940  | 1.947945  |
| 34 | 6 | 0 | -1.961376 | 3.574346  | -0.377743 |
| 35 | 1 | 0 | -1.281395 | 3.567976  | -2.411132 |
| 36 | 1 | 0 | -2.466149 | 3.265687  | 1.704624  |
| 37 | 8 | 0 | -2.655407 | 4.743813  | -0.620188 |
| 38 | 6 | 0 | -3.355454 | 5.320039  | 0.460257  |
| 39 | 1 | 0 | -2.686775 | 5.577236  | 1.294570  |
| 40 | 1 | 0 | -3.815209 | 6.234578  | 0.078458  |
| 41 | 1 | 0 | -4.146301 | 4.657218  | 0.841997  |
| 42 | 6 | 0 | 1.492208  | 0.709962  | 1.821872  |
| 43 | 1 | 0 | 1.077820  | 1.693336  | 2.082359  |
| 44 | 1 | 0 | 2.578730  | 0.789657  | 1.948706  |
| 45 | 6 | 0 | 0.984696  | -0.339303 | 2.817839  |
| 46 | 1 | 0 | -0.097875 | -0.487075 | 2.744484  |

|    |   |   |          |           |           |
|----|---|---|----------|-----------|-----------|
| 47 | 1 | 0 | 1.460563 | -1.311311 | 2.637475  |
| 48 | 1 | 0 | 1.332959 | -0.694664 | 0.222679  |
| 49 | 1 | 0 | 1.900414 | 0.842354  | -1.649312 |
| 50 | 1 | 0 | 1.214751 | -0.046054 | 3.848360  |
| 51 | 6 | 0 | 3.633144 | 0.552437  | -0.453469 |
| 52 | 6 | 0 | 4.591540 | 1.289581  | 0.256481  |
| 53 | 6 | 0 | 4.031766 | -0.670199 | -1.017220 |
| 54 | 6 | 0 | 5.896104 | 0.815225  | 0.415489  |
| 55 | 1 | 0 | 4.312175 | 2.249901  | 0.683002  |
| 56 | 6 | 0 | 5.332612 | -1.148752 | -0.864156 |
| 57 | 1 | 0 | 3.311621 | -1.244682 | -1.597022 |
| 58 | 6 | 0 | 6.271291 | -0.407578 | -0.141254 |
| 59 | 1 | 0 | 6.620226 | 1.405784  | 0.970476  |
| 60 | 1 | 0 | 5.618013 | -2.095459 | -1.315735 |
| 61 | 1 | 0 | 7.286162 | -0.776372 | -0.021843 |

-----  
**TS9** (SCF energy in toluene: -1252.767195 a.u.; Free energy in toluene: -1252.294542 a.u.)  
 -----

| Center<br>Number | Atomic<br>Number | Atomic<br>Type | Coordinates (Angstroms) |           |           |
|------------------|------------------|----------------|-------------------------|-----------|-----------|
|                  |                  |                | X                       | Y         | Z         |
| 1                | 28               | 0              | 1.319186                | -0.514314 | 0.727375  |
| 2                | 6                | 0              | -0.772847               | 0.533117  | 2.902556  |
| 3                | 6                | 0              | 0.558335                | 1.181606  | 0.627536  |
| 4                | 6                | 0              | 1.154868                | 2.189584  | 1.464347  |
| 5                | 6                | 0              | 0.158336                | 1.668157  | -0.660836 |
| 6                | 6                | 0              | 1.354249                | 3.499707  | 1.047593  |
| 7                | 1                | 0              | 1.476543                | 1.925482  | 2.467741  |
| 8                | 6                | 0              | 0.352185                | 2.988381  | -1.078145 |
| 9                | 1                | 0              | -0.314575               | 0.989263  | -1.364882 |
| 10               | 6                | 0              | 0.952513                | 3.921726  | -0.226803 |
| 11               | 1                | 0              | 1.821846                | 4.225433  | 1.708429  |
| 12               | 1                | 0              | 0.025840                | 3.272001  | -2.074011 |
| 13               | 8                | 0              | 1.188844                | 5.247191  | -0.535263 |
| 14               | 6                | 0              | 0.758473                | 5.708122  | -1.797022 |
| 15               | 1                | 0              | -0.327358               | 5.594755  | -1.929116 |
| 16               | 1                | 0              | 1.012880                | 6.769639  | -1.841663 |
| 17               | 1                | 0              | 1.264225                | 5.186744  | -2.623309 |
| 18               | 6                | 0              | -0.564646               | 0.007460  | 1.479573  |
| 19               | 1                | 0              | -1.060000               | 1.591332  | 2.893936  |
| 20               | 1                | 0              | -0.249973               | -1.061671 | 1.591042  |
| 21               | 1                | 0              | 0.140912                | 0.447017  | 3.497966  |
| 22               | 6                | 0              | 3.874496                | -1.199159 | -0.958254 |
| 23               | 6                | 0              | 3.148580                | -1.715874 | -2.212944 |

|    |   |   |           |           |           |
|----|---|---|-----------|-----------|-----------|
| 24 | 6 | 0 | 4.162299  | -2.346077 | 0.027923  |
| 25 | 6 | 0 | 1.899490  | -2.543609 | -1.881945 |
| 26 | 1 | 0 | 3.858434  | -2.334265 | -2.778711 |
| 27 | 1 | 0 | 2.890098  | -0.869842 | -2.861833 |
| 28 | 6 | 0 | 2.951582  | -3.243242 | 0.347520  |
| 29 | 1 | 0 | 4.943371  | -2.980711 | -0.408289 |
| 30 | 1 | 0 | 4.582722  | -1.940336 | 0.958469  |
| 31 | 6 | 0 | 2.246325  | -3.704232 | -0.940055 |
| 32 | 1 | 0 | 1.455197  | -2.933372 | -2.804806 |
| 33 | 1 | 0 | 1.148449  | -1.897264 | -1.408287 |
| 34 | 1 | 0 | 1.345099  | -4.275005 | -0.680838 |
| 35 | 1 | 0 | 2.916743  | -4.405964 | -1.454238 |
| 36 | 1 | 0 | 3.331487  | -4.139287 | 0.863099  |
| 37 | 1 | 0 | 4.842116  | -0.781817 | -1.276582 |
| 38 | 7 | 0 | 3.067599  | -0.146010 | -0.293214 |
| 39 | 1 | 0 | 3.630975  | 0.339352  | 0.405655  |
| 40 | 1 | 0 | 2.786353  | 0.570137  | -0.963827 |
| 41 | 7 | 0 | 1.992572  | -2.525524 | 1.228752  |
| 42 | 1 | 0 | 1.199338  | -3.136084 | 1.423607  |
| 43 | 1 | 0 | 2.432761  | -2.348815 | 2.132006  |
| 44 | 1 | 0 | -1.553027 | -0.025715 | 3.433153  |
| 45 | 6 | 0 | -1.853795 | -0.036301 | 0.647806  |
| 46 | 1 | 0 | -2.243869 | 0.982478  | 0.521724  |
| 47 | 1 | 0 | -1.624407 | -0.396583 | -0.360860 |
| 48 | 6 | 0 | -2.974260 | -0.938880 | 1.219373  |
| 49 | 1 | 0 | -2.584373 | -1.957190 | 1.349502  |
| 50 | 1 | 0 | -3.265611 | -0.586130 | 2.214812  |
| 51 | 6 | 0 | -4.196279 | -0.976772 | 0.327144  |
| 52 | 6 | 0 | -5.189631 | 0.008121  | 0.427512  |
| 53 | 6 | 0 | -4.349831 | -1.972662 | -0.647438 |
| 54 | 6 | 0 | -6.299207 | 0.000234  | -0.418305 |
| 55 | 1 | 0 | -5.091272 | 0.787633  | 1.179606  |
| 56 | 6 | 0 | -5.458052 | -1.986271 | -1.496114 |
| 57 | 1 | 0 | -3.593296 | -2.749485 | -0.737107 |
| 58 | 6 | 0 | -6.437772 | -0.998188 | -1.384731 |
| 59 | 1 | 0 | -7.058160 | 0.771853  | -0.320268 |
| 60 | 1 | 0 | -5.558287 | -2.771190 | -2.241158 |
| 59 | 1 | 0 | -7.058160 | 0.771853  | -0.320268 |
| 60 | 1 | 0 | -5.558287 | -2.771190 | -2.241158 |
| 61 | 1 | 0 | -7.302797 | -1.008057 | -2.041882 |

---

**TS10** (SCF energy in toluene: -1252.767907 a.u.; Free energy in toluene: -1252.296979 a.u.)

| Center<br>Number | Atomic<br>Number | Atomic<br>Type | Coordinates (Angstroms) |           |           |
|------------------|------------------|----------------|-------------------------|-----------|-----------|
|                  |                  |                | X                       | Y         | Z         |
| 1                | 28               | 0              | -1.311494               | -0.746942 | -0.501501 |
| 2                | 6                | 0              | 1.597572                | 1.045021  | -0.968099 |
| 3                | 6                | 0              | -0.942419               | 1.066411  | -0.306574 |
| 4                | 6                | 0              | -1.231570               | 1.909426  | -1.438966 |
| 5                | 6                | 0              | -1.200186               | 1.680012  | 0.961131  |
| 6                | 6                | 0              | -1.766414               | 3.181601  | -1.306953 |
| 7                | 1                | 0              | -1.031482               | 1.535710  | -2.441046 |
| 8                | 6                | 0              | -1.740076               | 2.964168  | 1.093421  |
| 9                | 1                | 0              | -0.962090               | 1.128987  | 1.868867  |
| 10               | 6                | 0              | -2.031907               | 3.727797  | -0.040264 |
| 11               | 1                | 0              | -1.991337               | 3.783756  | -2.183804 |
| 12               | 1                | 0              | -1.918470               | 3.356123  | 2.089946  |
| 13               | 8                | 0              | -2.563333               | 5.002648  | -0.029483 |
| 14               | 6                | 0              | -2.819334               | 5.589926  | 1.227058  |
| 15               | 1                | 0              | -1.904454               | 5.692153  | 1.828691  |
| 16               | 1                | 0              | -3.225324               | 6.584175  | 1.026784  |
| 17               | 1                | 0              | -3.554855               | 5.015671  | 1.809751  |
| 18               | 6                | 0              | 0.560366                | 0.117556  | -0.316451 |
| 19               | 1                | 0              | 0.814986                | -0.064765 | 0.732942  |
| 20               | 1                | 0              | 1.573346                | 2.018978  | -0.461031 |
| 21               | 1                | 0              | 0.645798                | -0.854404 | -0.858456 |
| 22               | 6                | 0              | 3.040239                | 0.508861  | -0.970993 |
| 23               | 1                | 0              | 3.075284                | -0.470635 | -1.467825 |
| 24               | 1                | 0              | 3.662975                | 1.180057  | -1.577509 |
| 25               | 6                | 0              | 3.679577                | 0.387426  | 0.428499  |
| 26               | 1                | 0              | 3.609032                | 1.360304  | 0.932026  |
| 27               | 1                | 0              | 3.101944                | -0.319581 | 1.035112  |
| 28               | 6                | 0              | 5.125925                | -0.055922 | 0.380256  |
| 29               | 6                | 0              | 6.160656                | 0.880623  | 0.244311  |
| 30               | 6                | 0              | 5.467402                | -1.414483 | 0.434821  |
| 31               | 6                | 0              | 7.493331                | 0.474938  | 0.163751  |
| 32               | 1                | 0              | 5.916436                | 1.939873  | 0.205906  |
| 33               | 6                | 0              | 6.798480                | -1.826621 | 0.354193  |
| 34               | 1                | 0              | 4.679414                | -2.156183 | 0.546718  |
| 35               | 6                | 0              | 7.817465                | -0.882164 | 0.217888  |
| 36               | 1                | 0              | 8.279167                | 1.218826  | 0.063328  |
| 37               | 1                | 0              | 7.040347                | -2.885088 | 0.402725  |
| 38               | 1                | 0              | 8.854549                | -1.200254 | 0.158809  |
| 39               | 1                | 0              | 1.299916                | 1.238420  | -2.004836 |
| 40               | 6                | 0              | -4.221966               | -1.861289 | -0.282583 |



|    |   |   |           |           |           |
|----|---|---|-----------|-----------|-----------|
| 41 | 6 | 0 | -4.293637 | -1.964657 | 1.250985  |
| 42 | 6 | 0 | -3.693558 | -3.168450 | -0.903482 |
| 43 | 6 | 0 | -2.976430 | -2.434287 | 1.882511  |
| 44 | 1 | 0 | -5.093186 | -2.675153 | 1.500364  |
| 45 | 1 | 0 | -4.598285 | -0.997104 | 1.669063  |
| 46 | 6 | 0 | -2.405016 | -3.717506 | -0.261000 |
| 47 | 1 | 0 | -4.473189 | -3.932994 | -0.798728 |
| 48 | 1 | 0 | -3.542443 | -3.032740 | -1.983191 |
| 49 | 6 | 0 | -2.522944 | -3.766931 | 1.272186  |
| 50 | 1 | 0 | -3.101367 | -2.544514 | 2.965717  |
| 51 | 1 | 0 | -2.202195 | -1.672986 | 1.721397  |
| 52 | 1 | 0 | -1.564763 | -4.084573 | 1.703753  |
| 53 | 1 | 0 | -3.248275 | -4.551878 | 1.525255  |
| 54 | 1 | 0 | -2.269579 | -4.749281 | -0.621340 |
| 55 | 1 | 0 | -5.245293 | -1.704067 | -0.656945 |
| 56 | 7 | 0 | -3.360186 | -0.721159 | -0.683908 |
| 57 | 1 | 0 | -3.491936 | -0.513626 | -1.674109 |
| 58 | 1 | 0 | -3.629987 | 0.125920  | -0.184418 |
| 59 | 7 | 0 | -1.236299 | -2.889597 | -0.661740 |
| 60 | 1 | 0 | -0.397631 | -3.250827 | -0.206825 |
| 61 | 1 | 0 | -1.076501 | -2.998534 | -1.663529 |

-----  
**IM2'** (SCF energy in toluene: -905.991947 a.u; Free energy in toluene: -905.642382 a.u.)  
 -----

| Center<br>Number | Atomic<br>Number | Atomic<br>Type | Coordinates (Angstroms) |           |           |
|------------------|------------------|----------------|-------------------------|-----------|-----------|
|                  |                  |                | X                       | Y         | Z         |
| 1                | 28               | 0              | -0.998354               | -1.455364 | -0.283922 |
| 2                | 6                | 0              | 0.805934                | -1.698387 | -0.815481 |
| 3                | 6                | 0              | 0.349587                | -2.788710 | 0.026947  |
| 4                | 1                | 0              | 0.761900                | -2.864598 | 1.039362  |
| 5                | 1                | 0              | 0.184231                | -3.768633 | -0.431580 |
| 6                | 6                | 0              | -3.586921               | 1.661810  | 1.256928  |
| 7                | 6                | 0              | -4.067823               | 2.899386  | 0.475999  |
| 8                | 6                | 0              | -2.057112               | 1.514398  | 1.143457  |
| 9                | 6                | 0              | -3.590919               | 2.893721  | -0.984445 |
| 10               | 1                | 0              | -3.684824               | 3.794712  | 0.983992  |
| 11               | 1                | 0              | -5.163105               | 2.963857  | 0.520671  |
| 12               | 6                | 0              | -1.538330               | 1.509285  | -0.305794 |
| 13               | 1                | 0              | -1.594589               | 2.357693  | 1.670728  |
| 14               | 1                | 0              | -1.723584               | 0.600719  | 1.649451  |
| 15               | 6                | 0              | -2.064111               | 2.741110  | -1.071371 |
| 16               | 1                | 0              | -3.901188               | 3.819034  | -1.483321 |
| 17               | 1                | 0              | -4.080701               | 2.072799  | -1.520775 |

|    |   |   |           |           |           |
|----|---|---|-----------|-----------|-----------|
| 18 | 1 | 0 | -1.740791 | 2.692373  | -2.119672 |
| 19 | 1 | 0 | -1.586726 | 3.634419  | -0.645205 |
| 20 | 1 | 0 | -0.444598 | 1.549521  | -0.281635 |
| 21 | 1 | 0 | -3.827311 | 1.818988  | 2.322592  |
| 22 | 7 | 0 | -4.245038 | 0.451036  | 0.724532  |
| 23 | 1 | 0 | -3.905468 | -0.374396 | 1.216424  |
| 24 | 1 | 0 | -5.249241 | 0.506575  | 0.879068  |
| 25 | 7 | 0 | -1.893338 | 0.218938  | -0.967096 |
| 26 | 1 | 0 | -2.909604 | 0.108218  | -0.892008 |
| 27 | 1 | 0 | -1.653262 | 0.274953  | -1.955884 |
| 28 | 8 | 0 | -2.697565 | -2.291685 | 0.843389  |
| 29 | 6 | 0 | -3.577618 | -3.133182 | 0.084448  |
| 30 | 1 | 0 | -4.310122 | -2.477333 | -0.390571 |
| 31 | 1 | 0 | -3.033707 | -3.681526 | -0.691388 |
| 32 | 1 | 0 | -4.101916 | -3.839239 | 0.739893  |
| 33 | 6 | 0 | 1.861527  | -0.711619 | -0.346222 |
| 34 | 1 | 0 | 1.745013  | 0.252429  | -0.862869 |
| 35 | 1 | 0 | 1.737083  | -0.503728 | 0.724513  |
| 36 | 6 | 0 | 3.310765  | -1.212641 | -0.586670 |
| 37 | 1 | 0 | 3.441023  | -2.160632 | -0.051341 |
| 38 | 1 | 0 | 3.430472  | -1.436362 | -1.654424 |
| 39 | 6 | 0 | 4.366821  | -0.221975 | -0.152376 |
| 40 | 6 | 0 | 4.846316  | -0.209422 | 1.165720  |
| 41 | 6 | 0 | 4.865534  | 0.739025  | -1.044042 |
| 42 | 6 | 0 | 5.791006  | 0.730200  | 1.580578  |
| 43 | 1 | 0 | 4.477028  | -0.950442 | 1.871257  |
| 44 | 6 | 0 | 5.810355  | 1.681394  | -0.635245 |
| 45 | 1 | 0 | 4.512079  | 0.742038  | -2.072938 |
| 46 | 6 | 0 | 6.277159  | 1.680840  | 0.680605  |
| 47 | 1 | 0 | 6.151840  | 0.716925  | 2.605749  |
| 48 | 1 | 0 | 6.186322  | 2.412798  | -1.345986 |
| 49 | 1 | 0 | 7.015808  | 2.410681  | 1.000184  |
| 50 | 1 | 0 | 0.884550  | -1.911853 | -1.889161 |
| 51 | 1 | 0 | -1.926566 | -2.817547 | 1.127316  |

-----  
**1a** (SCF energy in toluene: -388.321755 a.u.; Free energy in toluene: -388.167277 a.u.)  
 -----

| Center<br>Number | Atomic<br>Number | Atomic<br>Type | Coordinates (Angstroms) |           |           |
|------------------|------------------|----------------|-------------------------|-----------|-----------|
|                  |                  |                | X                       | Y         | Z         |
| 1                | 6                | 0              | -3.245616               | 0.173257  | -0.365113 |
| 2                | 6                | 0              | -2.487414               | 1.307143  | -0.069536 |
| 3                | 6                | 0              | -1.151783               | 1.176391  | 0.312109  |
| 4                | 6                | 0              | -0.548396               | -0.084952 | 0.405833  |

|    |   |   |           |           |           |
|----|---|---|-----------|-----------|-----------|
| 5  | 6 | 0 | -1.322279 | -1.214665 | 0.107435  |
| 6  | 6 | 0 | -2.658287 | -1.089672 | -0.274640 |
| 7  | 1 | 0 | -4.286426 | 0.272559  | -0.659143 |
| 8  | 1 | 0 | -2.936956 | 2.294246  | -0.131771 |
| 9  | 1 | 0 | -0.568887 | 2.064229  | 0.546148  |
| 10 | 1 | 0 | -0.873654 | -2.202739 | 0.181276  |
| 11 | 1 | 0 | -3.241715 | -1.978758 | -0.497096 |
| 12 | 6 | 0 | 0.911536  | -0.219953 | 0.780171  |
| 13 | 1 | 0 | 1.201753  | 0.592749  | 1.455766  |
| 14 | 1 | 0 | 1.067717  | -1.155775 | 1.331103  |
| 15 | 6 | 0 | 1.851534  | -0.200323 | -0.451112 |
| 16 | 1 | 0 | 1.714682  | 0.739387  | -0.998741 |
| 17 | 1 | 0 | 1.543352  | -1.006833 | -1.131298 |
| 18 | 6 | 0 | 3.297789  | -0.374690 | -0.079288 |
| 19 | 6 | 0 | 4.265355  | 0.511461  | -0.314600 |
| 20 | 1 | 0 | 3.547305  | -1.305187 | 0.433604  |
| 21 | 1 | 0 | 5.293606  | 0.329141  | -0.016623 |
| 22 | 1 | 0 | 4.064591  | 1.452995  | -0.820777 |

-----  
**2a** (SCF energy in toluene: -522.888236 a.u.; Free energy in toluene: -522.76702 a.u.)  
 -----

| Center<br>Number | Atomic<br>Number | Atomic<br>Type | Coordinates (Angstroms) |           |           |
|------------------|------------------|----------------|-------------------------|-----------|-----------|
|                  |                  |                | X                       | Y         | Z         |
| 1                | 6                | 0              | 1.085549                | 0.023679  | 0.000023  |
| 2                | 6                | 0              | 0.464652                | 1.289490  | -0.000182 |
| 3                | 6                | 0              | 0.247589                | -1.101392 | 0.000276  |
| 4                | 6                | 0              | -0.915684               | 1.424379  | -0.000116 |
| 5                | 1                | 0              | 1.084632                | 2.181266  | -0.000402 |
| 6                | 6                | 0              | -1.143524               | -0.990942 | 0.000333  |
| 7                | 1                | 0              | 0.694235                | -2.091602 | 0.000445  |
| 8                | 6                | 0              | -1.730037               | 0.281052  | 0.000144  |
| 9                | 1                | 0              | -1.393303               | 2.398912  | -0.000281 |
| 10               | 1                | 0              | -1.752958               | -1.886992 | 0.000542  |
| 11               | 8                | 0              | -3.074727               | 0.514175  | 0.000204  |
| 12               | 6                | 0              | -3.951321               | -0.601541 | -0.000325 |
| 13               | 1                | 0              | -3.815703               | -1.224304 | 0.893056  |
| 14               | 1                | 0              | -4.961948               | -0.190475 | -0.000769 |
| 15               | 1                | 0              | -3.814819               | -1.224135 | -0.893683 |
| 16               | 5                | 0              | 2.635537                | -0.120430 | -0.000040 |
| 17               | 8                | 0              | 3.395637                | 1.026925  | 0.000201  |
| 18               | 1                | 0              | 4.348896                | 0.885643  | 0.000444  |
| 19               | 8                | 0              | 3.173291                | -1.387661 | -0.000326 |
| 20               | 1                | 0              | 4.136330                | -1.422020 | -0.000702 |

-----  
**MeOH** (SCF energy in toluene: -115.743891 a.u.; Free energy in toluene: -115.71522 a.u.)  
-----

| Center<br>Number | Atomic<br>Number | Atomic<br>Type | Coordinates (Angstroms) |           |           |
|------------------|------------------|----------------|-------------------------|-----------|-----------|
|                  |                  |                | X                       | Y         | Z         |
| 1                | 8                | 0              | 0.749330                | -0.122046 | -0.000067 |
| 2                | 6                | 0              | -0.661572               | 0.019398  | -0.000013 |
| 3                | 1                | 0              | -1.037892               | 0.542800  | 0.891984  |
| 4                | 1                | 0              | -1.038584               | 0.543340  | -0.891511 |
| 5                | 1                | 0              | -1.082431               | -0.989421 | -0.000029 |
| 6                | 1                | 0              | 1.133699                | 0.763265  | 0.000172  |

-----  
**MeOB(OH)<sub>2</sub>** (SCF energy in toluene: -291.850897 a.u.; Free energy in toluene: -291.803582 a.u.)  
-----

| Center<br>Number | Atomic<br>Number | Atomic<br>Type | Coordinates (Angstroms) |           |           |
|------------------|------------------|----------------|-------------------------|-----------|-----------|
|                  |                  |                | X                       | Y         | Z         |
| 1                | 5                | 0              | -0.519363               | -0.004493 | 0.000259  |
| 2                | 8                | 0              | -1.703488               | -0.701193 | 0.002737  |
| 3                | 1                | 0              | -1.544228               | -1.652312 | 0.001144  |
| 4                | 8                | 0              | -0.541158               | 1.366507  | 0.000014  |
| 5                | 1                | 0              | -1.446926               | 1.696073  | -0.008362 |
| 6                | 8                | 0              | 0.659427                | -0.694784 | -0.005384 |
| 7                | 6                | 0              | 1.917425                | -0.030000 | 0.002049  |
| 8                | 1                | 0              | 2.384972                | -0.135667 | 0.987424  |
| 9                | 1                | 0              | 2.565008                | -0.503136 | -0.742500 |
| 10               | 1                | 0              | 1.815193                | 1.033264  | -0.230237 |

-----  
**3a** (SCF energy in toluene: -735.181125 a.u.; Free energy in toluene: -734.900417 a.u.)  
-----

| Center<br>Number | Atomic<br>Number | Atomic<br>Type | Coordinates (Angstroms) |           |           |
|------------------|------------------|----------------|-------------------------|-----------|-----------|
|                  |                  |                | X                       | Y         | Z         |
| 1                | 6                | 0              | -2.724835               | 2.394992  | 0.032340  |
| 2                | 6                | 0              | -3.079290               | 3.664902  | -0.747498 |
| 3                | 1                | 0              | -3.000419               | 3.501349  | -1.828416 |
| 4                | 1                | 0              | -2.406593               | 4.491130  | -0.490536 |
| 5                | 6                | 0              | 0.630750                | 0.405843  | 0.413843  |
| 6                | 6                | 0              | 1.533031                | 0.993689  | 1.315414  |
| 7                | 6                | 0              | 1.165078                | -0.356275 | -0.627554 |
| 8                | 6                | 0              | 2.906061                | 0.832731  | 1.182601  |
| 9                | 1                | 0              | 1.149967                | 1.589387  | 2.141014  |
| 10               | 6                | 0              | 2.543932                | -0.530024 | -0.780049 |

|    |   |   |           |           |           |
|----|---|---|-----------|-----------|-----------|
| 11 | 1 | 0 | 0.499574  | -0.843732 | -1.333370 |
| 12 | 6 | 0 | 3.423266  | 0.067344  | 0.128533  |
| 13 | 1 | 0 | 3.598467  | 1.284569  | 1.885444  |
| 14 | 1 | 0 | 2.913594  | -1.133684 | -1.600609 |
| 15 | 8 | 0 | 4.785866  | -0.037942 | 0.081453  |
| 16 | 6 | 0 | 5.360084  | -0.806570 | -0.962463 |
| 17 | 1 | 0 | 5.117009  | -0.395610 | -1.951016 |
| 18 | 1 | 0 | 6.439828  | -0.761536 | -0.812109 |
| 19 | 1 | 0 | 5.034337  | -1.854112 | -0.922453 |
| 20 | 6 | 0 | -1.292227 | 1.915869  | -0.234447 |
| 21 | 1 | 0 | -1.149605 | 1.734408  | -1.307971 |
| 22 | 6 | 0 | -0.871163 | 0.660126  | 0.569325  |
| 23 | 1 | 0 | -0.590411 | 2.720381  | 0.019098  |
| 24 | 1 | 0 | -1.033122 | 0.903264  | 1.628272  |
| 25 | 6 | 0 | -1.709660 | -0.583687 | 0.282807  |
| 26 | 6 | 0 | -1.969691 | -1.489010 | 1.321974  |
| 27 | 6 | 0 | -2.214326 | -0.884803 | -0.990194 |
| 28 | 6 | 0 | -2.701727 | -2.654672 | 1.101675  |
| 29 | 1 | 0 | -1.588037 | -1.275165 | 2.317459  |
| 30 | 6 | 0 | -2.947692 | -2.051770 | -1.216954 |
| 31 | 1 | 0 | -2.043235 | -0.201807 | -1.816759 |
| 32 | 6 | 0 | -3.194498 | -2.942037 | -0.172546 |
| 33 | 1 | 0 | -2.890149 | -3.336964 | 1.925869  |
| 34 | 1 | 0 | -3.329681 | -2.260688 | -2.212409 |
| 35 | 1 | 0 | -3.768028 | -3.847545 | -0.347691 |
| 36 | 1 | 0 | -3.434654 | 1.598540  | -0.219179 |
| 37 | 1 | 0 | -4.102675 | 3.991184  | -0.535676 |
| 38 | 1 | 0 | -2.845657 | 2.580281  | 1.108580  |

---
